# Supplementary material
Source: PubMed Central journal article supplement (PMC7988368)
Supplement: jama-e211727-s001.pdf [file jama-e211727-s001.pdf]

## Supplemental Online Content

Russotto V, Myatra S, Laffey JG, et al. Intubation practices and peri-intubation adverse events in critically ill patients from 29 countries. *JAMA*. doi:10.1001/jama.2021.1727

**eMethods.** Variables and outcomes definitions, data quality control

**eTable 1.** Outcomes of patients' undergoing reintubations

**eTable 2.** Patients' characteristics, reason for intubation and procedure description in patients with and without peri-intubation major adverse events

**eTable 3.** Center, operator's characteristics and intubation setting

**eTable 4.** Outcomes distribution according to the geographical areas of participating centers

**eTable 5.** Missing values for the study outcomes

**eFigure 1.** Incidence of peri-intubation major adverse events and other peri-intubation events

**eFigure 2.** Incidence of peri-intubation adverse events according to the number of attempts

**eFigure 3.** Kaplan-Meier survival curves by peri-intubation major adverse events, cardiovascular instability, cardiac arrest, and severe hypoxia

**eTable 6.** Multivariable analysis of organizational, operator, and patient factors associated with major peri-intubation adverse events

**eTable 7.** Multivariable analysis of patient and operator factors associated with first pass intubation failure

**eTable 8.** Adjusted ICU mortality

**eTable 9.** Adjusted mortality at 28 days after intubation

**eAppendix 1.** List of endorsing Scientific Societies/Networks endorsing the study

**eAppendix 2.** National Coordinators of INTUBE Study

**eAppendix 3.** List of INTUBE study centers with local investigators.

**eAppendix 4.** Study protocol.

**eAppendix 5.** Case report form. Search strategy for Medline (using PubMed)

This supplemental material has been provided by the authors to give readers additional information about their work.

**eMethods. Variables and outcomes definitions.**

| Variable                                       | Definition                                                                                                                                                                              |
|------------------------------------------------|-----------------------------------------------------------------------------------------------------------------------------------------------------------------------------------------|
| <i>Critically ill patient</i>                  | Any patient with a life-threatening impairment of the cardiovascular, respiratory or neurological system requiring in-hospital intubation.                                              |
| <i>Primary reason for intubation</i>           | The most relevant clinical alteration leading the clinician to proceed with tracheal intubation.                                                                                        |
| <i>Cardiovascular instability<sup>a</sup></i>  | Clinical features of circulatory shock with hypotension (or need of vasopressors use) and/or signs of organ hypoperfusion.                                                              |
| <i>Respiratory failure</i>                     | Clinical features of respiratory distress associated with impaired gas exchange                                                                                                         |
| <i>Neurological impairment</i>                 | Reduced level of consciousness with signs of hypoventilation, airway obstruction or impaired upper airways reflexes.                                                                    |
| <i>Airway obstruction</i>                      | Narrowing or occlusion of airways with impaired airflow driven by anatomic alterations or foreign bodies                                                                                |
| <i>Rapid sequence induction</i>                | Administration of rapid-onset induction agents and muscle relaxant with no ventilation between induction and laryngoscopy                                                               |
| <i>Laryngoscopy attempt</i>                    | Each introduction of the laryngoscope in patient's mouth.                                                                                                                               |
| <i>Duration of the intubation procedure</i>    | Difference between time of tracheal intubation confirmation and first laryngoscopy start                                                                                                |
| <i>Difficult tracheal intubation</i>           | Procedure requiring > 2 laryngoscopy attempts                                                                                                                                           |
| <i>Number of operators</i>                     | Number of operators on the scene potentially qualified to perform an intubation attempt                                                                                                 |
| <i>Daytime procedure</i>                       | Procedures performed from 8:00 am to 7:59 pm                                                                                                                                            |
| <i>Nighttime procedure</i>                     | Procedures performed between 8:00 pm and 7:59 am                                                                                                                                        |
| <i>Cardiac arrhythmia</i>                      | Occurrence of any supraventricular or ventricular arrhythmia within 30 minutes from the start of tracheal intubation                                                                    |
| <i>Cannot intubate cannot oxygenate (CICO)</i> | Impossibility to achieve a successful tracheal intubation and adequate patient's oxygenation.                                                                                           |
| <i>Emergency front of neck airway (FONA)</i>   | Emergency need for invasive access to the patient's airways to provide adequate oxygenation (e.g. cricothyroidotomy, percutaneous tracheostomy, surgical tracheostomy).                 |
| <i>Aspiration</i>                              | Inhalation of oropharyngeal or gastric contents into the larynx and the respiratory tract within the first 24 hours after intubation according to clinical and/or radiographic findings |
| <i>Esophageal intubation</i>                   | Accidental placement of the tracheal tube into the esophagus                                                                                                                            |
| <i>Pneumomediastinum/pneumothorax</i>          | Detection of air collection into the mediastinum or pleural space as the consequence of airway instrumentation                                                                          |

|                      |                                                                                                                                                      |
|----------------------|------------------------------------------------------------------------------------------------------------------------------------------------------|
| <i>Airway injury</i> | Any detectable and clinically relevant injury attributable to tracheal intubation procedure (e.g bleeding, tracheal or bronchial tear or laceration) |
| <i>Dental injury</i> | Any notable change in patient's dentition as the consequence of airway instrumentation.                                                              |

**eMethods. Data quality control.**

We held several live web-based meetings during which principal investigators provided training on the protocol, answered study related queries and provided support for issues arising during data collection in the electronic case report form (eCRF). At the time of data entry, the eCRF automatically generated queries in case of missing, outlying or contradictory values and response was required before marking record as complete. Three monitors manually screened all complete CRFs for consistency of clinical data (e.g. reported indication for tracheal intubation and actual pre-intubation clinical condition) and for erroneous values and they sent a request of verification to each local investigator. A second check for missing and outlying values was performed before the statistical analysis. We followed the Strengthening the Reporting of Observational Studies in Epidemiology (STROBE) statement guidelines for observational cohort studies.

**eTable 1. Outcomes of patients' undergoing reintubations**

| Variable                                                | Value     | Missing |
|---------------------------------------------------------|-----------|---------|
| N° of patients undergoing reintubation                  | 94        | 0       |
| Major intubation related complication, No. (%)          | 42 (44.7) | 0 (0.0) |
| Cardiovascular instability, No. (%)                     | 32 (36.8) | 7 (7.5) |
| Systolic blood pressure < 65 mmHg                       | 2 (2.2)   | 1 (1.1) |
| Systolic blood pressure < 90 mmHg for > 30 minutes,     | 3 (3.2)   | 1 (1.1) |
| New need/increase of vasopressors                       | 32 (34.0) | 0 (0.0) |
| Fluid bolus > 15 ml/Kg                                  | 2 (2.3)   | 7 (7.5) |
| Cardiac arrest, No. (%)                                 | 2 (2.1)   | 0 (0.0) |
| With return of spontaneous circulation                  | 2 (100.0) | 0 (0.0) |
| Reason:                                                 |           |         |
| Hypoxia                                                 | 1 (50.0)  | 0 (0.0) |
| Thrombosis (coronary or pulmonary)                      | 1 (50.0)  | 0 (0.0) |
| Severe hypoxia (lowest SpO <sub>2</sub> < 80%), No. (%) | 12 (12.9) | 1 (1.1) |
| Secondary complications, No. (%)                        |           |         |
| New onset cardiac arrhythmia                            | 1 (1.1)   | 0 (0.0) |
| Atrial fibrillation                                     | 1 (100.0) | 0 (0.0) |
| Aspiration of gastric contents, No. (%)                 | 2 (2.2)   | 1 (1.1) |
| Airway injury, No. (%)                                  | 2 (2.2)   | 1 (1.1) |
| Laryngeal laceration                                    | 1 (50.0)  | 0 (0.0) |
| Other                                                   | 1 (50.0)  | 0 (0.0) |
| Pneumothorax, No. (%)                                   | 3 (3.2)   | 1 (1.1) |
| Pneumomediastinum, No. (%)                              | 1 (1.1)   | 1 (1.1) |

**eTable 2. Patients' characteristics, reason for intubation and procedure description in patients with and without peri-intubation major adverse events**

| Variable                                                       | All (N = 2964)       | Major adverse events (N = 1340) | No major adverse events (N = 1624) | P-value |
|----------------------------------------------------------------|----------------------|---------------------------------|------------------------------------|---------|
| Age, median (IQR), y                                           | 63.0 (49.0-74.0)     | 65.0 (52.0-75.0)                | 61.0 (45.0-73.0)                   | <.001   |
| Women, No. (%)                                                 | 1107 (37.4)          | 513 (38.3)                      | 594 (36.6)                         | .359    |
| Weight, median (IQR), kg                                       | 71.2 (60.0-84.0)     | 72.2 (61.0-84.0)                | 70.0 (60.0-84.0)                   | .198    |
| BMI, median (IQR), kg/m <sup>2</sup>                           | 25.4 (22.5-29.4)     | 25.5 (22.4-29.4)                | 25.2 (22.5-29.0)                   | .307    |
| SOFA score <sup>a</sup> , median (IQR)                         | 7.0 (4.8-10.0)       | 8.0 (5.0-11.0)                  | 6.0 (4.0-9.0)                      | <.001   |
| Respiratory infection during previous 30 days, No. (%)         | 288 (9.7)            | 145 (10.8)                      | 143 (8.8)                          | .075    |
| Chronic disease, No. (%)                                       |                      |                                 |                                    |         |
| Arterial hypertension                                          | 1185 (40.0)          | 558 (41.6)                      | 627 (38.6)                         | .101    |
| Diabetes                                                       | 719 (24.3)           | 333 (24.9)                      | 386 (23.8)                         | .521    |
| COPD                                                           | 445 (15.0)           | 220 (16.4)                      | 225 (13.9)                         | .058    |
| Ischemic heart disease                                         | 423 (14.3)           | 223 (16.6)                      | 200 (12.3)                         | <.001   |
| Chronic renal failure                                          | 408 (13.8)           | 221 (16.5)                      | 187 (11.5)                         | <.001   |
| Solid neoplasm                                                 | 349 (11.8)           | 182 (13.6)                      | 167 (10.3)                         | .007    |
| Heart failure (NYHA classification III - IV)                   | 264 (8.9)            | 151 (11.3)                      | 113 (7.0)                          | <.001   |
| Chronic liver failure                                          | 176 (5.9)            | 87 (6.5)                        | 89 (5.5)                           | .279    |
| Hematologic malignancy                                         | 152 (5.1)            | 91 (6.8)                        | 61 (3.8)                           | <.001   |
| OSAS                                                           | 133 (4.5)            | 68 (5.1)                        | 65 (4.0)                           | .189    |
| Asthma                                                         | 116 (3.9)            | 50 (3.7)                        | 66 (4.1)                           | .712    |
| Neuromuscular disease                                          | 75 (2.5)             | 40 (3.0)                        | 35 (2.2)                           | .189    |
| Cardiac arrhythmia                                             | 72 (2.4)             | 38 (2.8)                        | 34 (2.1)                           | .235    |
| Interstitial lung disease                                      | 61 (2.1)             | 32 (2.4)                        | 29 (1.8)                           | .308    |
| Other <sup>b</sup>                                             | 814/2806 (29.0)      | 375 (29.9)                      | 439 (28.3)                         | .396    |
| Radiologic finding, No. (%)                                    |                      |                                 |                                    |         |
| Bilateral lung opacities                                       | 826 (27.9)           | 428 (31.9)                      | 398 (24.5)                         | <.001   |
| Pleural effusion                                               | 403 (13.6)           | 218 (16.3)                      | 185 (11.4)                         | <.001   |
| Unilateral lung opacities                                      | 364 (12.3)           | 181 (13.5)                      | 183 (11.3)                         | .073    |
| Other                                                          | 266 (9.0)            | 116 (8.7)                       | 150 (9.2)                          | .628    |
| Ongoing respiratory support, No. (%)                           |                      |                                 |                                    | <.001   |
| Standard oxygen                                                | 1509 (61.8)          | 668 (57.4)                      | 841 (65.8)                         |         |
| Noninvasive ventilation                                        | 521 (21.3)           | 272 (23.4)                      | 249 (19.5)                         |         |
| High flow nasal cannula                                        | 313 (12.8)           | 177 (15.2)                      | 136 (10.6)                         |         |
| Continuous positive airway pressure                            | 100 (4.1)            | 47 (4.0)                        | 53 (4.1)                           |         |
| PaO <sub>2</sub> /FiO <sub>2</sub> , median (IQR)              | 165.0 (100.0, 265.0) | 147.5 (91.5-242.9)              | 182.0 (110.0-286.7)                | <.001   |
| SpO <sub>2</sub> /FiO <sub>2</sub> <sup>c</sup> , median (IQR) | 165.7 (105.6, 261.1) | 150.0 (100.0-232.5)             | 188.5 (110.0-290.0)                | <.001   |
| Receiving vasopressor/inotropic support, No. (%)               | 769 (25.9)           | 455 (34.0)                      | 314 (19.3)                         | <.001   |

|                                                                  |              |              |              |       |
|------------------------------------------------------------------|--------------|--------------|--------------|-------|
| Fluid bolus 30 min before intubation, No. (%)                    | 1065 (37.7)  | 554 (43.1)   | 511 (33.1)   | <.001 |
| Systolic blood pressure, mean (SD), mmHg                         | 126.3 (35.7) | 116.0 (35.0) | 135.0 (34.0) | <.001 |
| Diastolic blood pressure, mean (SD), mmHg                        | 70.0 (20.7)  | 64.0 (20.0)  | 75 (20.0)    | <.001 |
| Heart rate, mean (SD)                                            | 103.7 (26.2) | 105.0 (27.0) | 102.0 (25.0) | .003  |
| Reason for intubation, No. (%)                                   |              |              |              | <.001 |
| Respiratory failure                                              | 1548 (52.3)  | 778 (58.2)   | 770 (47.4)   |       |
| Neurological impairment                                          | 902 (30.5)   | 295 (22.1)   | 607 (37.4)   |       |
| Cardiovascular instability                                       | 277 (9.4)    | 178 (13.3)   | 99 (6.1)     |       |
| Airway obstruction                                               | 137 (4.6)    | 50 (3.7)     | 87 (5.4)     |       |
| Emergent/Urgent procedure                                        | 29 (1.0)     | 9 (0.7)      | 20 (1.2)     |       |
| Other                                                            | 67 (2.2)     | 27 (2.0)     | 40 (2.5)     |       |
| Degree of emergency <sup>d</sup> , No. (%)                       |              |              |              | .295  |
| Tracheal intubation required without any delay <sup>e</sup>      | 1536 (51.9)  | 680 (50.7)   | 856 (52.8)   |       |
| Tracheal intubation required in < 1 hr                           | 1065 (35.9)  | 502 (37.5)   | 563 (34.7)   |       |
| Tracheal intubation required in ≥ 1 hr                           | 361 (12.2)   | 158 (11.8)   | 203 (12.5)   |       |
| At least one anticipated anatomical difficult airways, No. (%)   |              |              |              | <.001 |
| Yes                                                              | 1308 (44.1)  | 639 (47.7)   | 669 (41.2)   |       |
| No                                                               | 1487 (50.2)  | 639 (47.7)   | 848 (52.2)   |       |
| Not performed                                                    | 169 (5.7)    | 62 (4.6)     | 107 (6.6)    |       |
| Predictors of difficult airway management <sup>f</sup> , No. (%) |              |              |              |       |
| Obesity                                                          | 430 (15.8)   | 217 (17.4)   | 213 (14.5)   | .041  |
| High risk of full stomach                                        | 419 (15.4)   | 218 (17.5)   | 201 (13.7)   | .007  |
| Short neck                                                       | 376 (13.8)   | 197 (15.8)   | 179 (12.2)   | .007  |
| Reduced mouth opening (< 3 cm)                                   | 227 (8.4)    | 122 (9.8)    | 105 (7.1)    | .015  |
| Mallampati score III-IV                                          | 205 (7.5)    | 102 (8.2)    | 103 (7.0)    | .272  |
| Neck stiffness                                                   | 160 (5.9)    | 79 (6.3)     | 81 (5.5)     | .399  |
| Beard                                                            | 119 (4.4)    | 60 (4.8)     | 50 (4.0)     | .352  |
| Large tongue                                                     | 111 (4.1)    | 50 (4.0)     | 61 (4.1)     | .941  |
| Need of cervical spine immobilization                            | 80 (3.0)     | 32 (2.6)     | 48 (3.3)     | .342  |
| Retrognathia                                                     | 57 (2.1)     | 26 (2.1)     | 31 (2.1)     | .963  |
| Facial trauma                                                    | 41 (1.5)     | 17 (1.4)     | 24 (1.6)     | .683  |
| Past airway surgery/radiotherapy or untreated airway cancer      | 34 (1.3)     | 15 (1.2)     | 19 (1.3)     | .976  |
| Prognathism                                                      | 13 (0.5)     | 7 (0.6)      | 6 (0.4)      | .763  |
| MACOCHA score <sup>g</sup> ≥ 3                                   | 426 (14.4)   | 222 (16.6)   | 204 (12.6)   | .002  |
| Preoxygenation method, No. (%)                                   |              |              |              | <.001 |
| Bag-valve mask                                                   | 1847 (62.4)  | 835 (62.4)   | 1012 (62.4)  |       |
| Standard facemask                                                | 389 (13.2)   | 145 (10.8)   | 244 (15.1)   |       |
| Noninvasive ventilation                                          | 344 (11.6)   | 186 (13.9)   | 158 (9.8)    |       |

|                                                     |             |             |             |       |
|-----------------------------------------------------|-------------|-------------|-------------|-------|
| High flow nasal cannula                             | 160 (5.4)   | 84 (6.3)    | 76 (4.7)    |       |
| Anesthesia breathing circuit                        | 56 (1.9)    | 18 (1.3)    | 38 (2.3)    |       |
| Continuous positive airway pressure                 | 51 (1.7)    | 21 (1.6)    | 30 (1.9)    |       |
| Venturi system                                      | 47 (1.6)    | 22 (1.6)    | 25 (1.5)    |       |
| Nasal cannula                                       | 47 (1.6)    | 22 (1.6)    | 25 (1.5)    |       |
| Other                                               | 19 (0.6)    | 6 (0.5)     | 13 (0.8)    |       |
| Apneic oxygenation <sup>h</sup> , No. (%)           | 308 (10.4)  | 162 (12.1)  | 146 (9.0)   | .007  |
| Rapid sequence induction <sup>i</sup> , No. (%)     | 1727 (62.2) | 791 (63.5)  | 936 (61.1)  | .219  |
| Cricoid pressure, No. (%)                           | 1120 (37.9) | 519 (38.9)  | 601 (37.1)  | .334  |
| Induction agent, No. (%)                            |             |             |             |       |
| Propofol                                            | 1230 (41.5) | 523 (39.0)  | 707 (43.5)  | .015  |
| Midazolam                                           | 1079 (36.4) | 487 (36.3)  | 592 (36.5)  | .981  |
| Etomidate                                           | 527 (17.8)  | 251 (18.7)  | 276 (17.0)  | .237  |
| Ketamine                                            | 421 (14.2)  | 217 (16.2)  | 1123 (83.8) | .006  |
| Muscle relaxant use, No. (%)                        | 2095 (75.5) | 935 (75.1)  | 1160 (75.8) | .717  |
| Rocuronium                                          | 1239 (41.8) | 566 (42.2)  | 673 (41.4)  | .688  |
| Succinylcholine                                     | 646 (21.8)  | 272 (20.3)  | 374 (23.0)  | .081  |
| Other                                               | 191 (6.6)   | 84 (6.4)    | 107 (6.7)   | .839  |
| Opioid use, No. (%)                                 | 1415 (51.0) | 630 (50.6)  | 785 (51.3)  | .734  |
| Elective method for laryngoscopy, No. (%)           |             |             |             | .054  |
| Direct laryngoscopy with Macintosh or Miller blade  | 2416 (81.5) | 1082 (80.7) | 1334 (82.2) |       |
| Videolaryngoscopy                                   | 505 (17.1)  | 245 (18.3)  | 260 (16.0)  |       |
| First method used to confirm intubation, No. (%)    |             |             |             | <.001 |
| Auscultation                                        | 1711 (57.9) | 736 (55.2)  | 975 (60.1)  |       |
| Waveform capnography <sup>j</sup>                   | 758 (25.6)  | 372 (27.9)  | 386 (23.8)  |       |
| Colorimetric CO <sub>2</sub> detection <sup>m</sup> | 222 (7.5)   | 107 (8.0)   | 115 (7.1)   |       |
| Capnometry <sup>n</sup>                             | 138 (4.7)   | 68 (5.1)    | 70 (4.3)    |       |
| None                                                | 7 (0.2)     | 7 (0.5)     | 0 (0.0)     |       |
| Other <sup>o</sup>                                  | 120 (4.1)   | 44 (3.3)    | 76 (4.7)    |       |

Abbreviations: BMI, body mass index; COPD, chronic obstructive pulmonary disease; IQR, interquartile range; NYHA, New York Heart Association; SOFA, Sequential organ failure assessment.

<sup>a</sup>SOFA score was calculated with values last available before intubation. For all SOFA scores for which data points were missing, the corresponding value and omitted and the denominator adjusted accordingly.

<sup>b</sup>Other chronic disease includes seizure, stroke, endocrine disease, rheumatic disease, psychiatric disorder, immunosuppression.

<sup>c</sup>SpO<sub>2</sub>/FiO<sub>2</sub> was reported only when SpO<sub>2</sub> was ≤ 98%

<sup>d</sup>Degree of emergency was identified before intubation according to clinical judgment.

<sup>e</sup>Tracheal required without any delay indicates the need to proceed with intubation as soon as possible after patient presentation and assessment (e.g. within 5-10 minutes).

<sup>f</sup>Calculated on the 2716 patients on which all the predictors of difficult airway were evaluated.

<sup>g</sup>MACOCHA score is a predictive score of difficult intubation in intensive care unit. Its calculation includes the following items: Mallampati score III – IV (5 points), obstructive sleep apnea syndrome (2 points), reduced mobility of the cervical spine (1 point), limited mouth opening < 3 cm (1 point), coma (1 point), severe hypoxemia (1 point), non-anesthesiologist operator (1 point). It ranges from 0 (easy intubation) to 12 (very difficult intubation).

<sup>h</sup>Apneic oxygenation was defined as oxygen administration during laryngoscopy/fiberoscopy.

<sup>i</sup>Rapid sequence induction: rapid onset induction without positive pressure ventilation between induction and laryngoscopy.

<sup>j</sup>Waveform capnography: use of a monitor which provides the graphic measurement of exhaled CO<sub>2</sub> plotted against time.

<sup>m</sup>Colorimetric CO<sub>2</sub> detection: use of a device which employs a photochemical reaction to detect the presence of CO<sub>2</sub> in the exhaled air.

<sup>n</sup>Capnography: use of a monitor which provides only the absolute value of CO<sub>2</sub> concentration in the exhaled air.

<sup>o</sup>Other method used to confirm intubation includes chest x-ray and fiberoscopy.



**eTable 3. Center, operator's characteristics and intubation setting.**

| Variable                                                             | All<br>(N = 2964)  | Major adverse<br>events<br>(N = 1340) | No major adverse<br>events<br>(N = 1624) | P-value |
|----------------------------------------------------------------------|--------------------|---------------------------------------|------------------------------------------|---------|
| Academic hospital, No. (%)                                           | 1998 (67.4)        | 906 (67.6)                            | 1092 (67.2)                              | .861    |
| Trauma center, No. (%)                                               | 1686 (56.9)        | 729 (54.4)                            | 957 (58.9)                               | .015    |
| N° of ICUs, median (IQR)                                             | 2.0 (1.0, 4.0)     | 2.0 (1.0, 4.0)                        | 2.0 (1.0, 4.0)                           | .133    |
| Total ICU beds, No. (%)                                              |                    |                                       |                                          | .094    |
| < 10                                                                 | 252 (8.5)          | 126 (9.4)                             | 126 (7.8)                                |         |
| 10-20                                                                | 768 (25.9)         | 361 (26.9)                            | 407 (25.1)                               |         |
| > 20                                                                 | 1944 (65.6)        | 853 (63.7)                            | 1091 (67.2)                              |         |
| Frequency of emergency<br>intubation/week, median (IQR)              | 7.0 (5.0,<br>10.0) | 6.0 (5.0, 10.0)                       | 7.0 (5.0, 10.0)                          | .053    |
| Presence of a MET, No. (%)                                           | 2034 (68.6)        | 928 (69.3)                            | 1106 (68.1)                              | .527    |
| Application of an airway<br>management protocol, No.<br>(%) (n=2962) |                    |                                       |                                          | .635    |
| Yes                                                                  | 1510 (51.0)        | 695 (51.9)                            | 815 (50.2)                               |         |
| No                                                                   | 443 (15.0)         | 196 (14.6)                            | 247 (15.2)                               |         |
| Not available                                                        | 1009 (34.0)        | 447 (33.4)                            | 562 (34.6)                               |         |
| Use of a checklist for airway<br>management, No. (%)<br>(n=2962)     |                    |                                       |                                          | .244    |
| Yes                                                                  | 1494 (50.4)        | 660 (49.3)                            | 834 (51.4)                               |         |
| No                                                                   | 499 (16.9)         | 219 (16.4)                            | 280 (17.2)                               |         |
| Not available                                                        | 969 (32.7)         | 459 (34.3)                            | 510 (31.4)                               |         |
| Airway trolley at the place of<br>TI, No. (%) (n=2962)               |                    |                                       |                                          | .205    |
| Yes                                                                  | 2212 (74.7)        | 991 (74.1)                            | 1221 (75.2)                              |         |
| No                                                                   | 532 (18.0)         | 236 (17.6)                            | 296 (18.2)                               |         |
| Not available                                                        | 218 (7.3)          | 111 (8.3)                             | 107 (6.6)                                |         |
| Admission source, No. (%)                                            |                    |                                       |                                          | <.001   |
| Out-of hospital<br>admission/Emergency<br>Department                 | 1591 (55.6)        | 683 (52.5)                            | 908 (58.1)                               |         |
| Medical ward <sup>a</sup>                                            | 551 (19.2)         | 275 (21.1)                            | 276 (17.7)                               |         |
| Surgical ward <sup>a</sup>                                           | 247 (8.6)          | 138 (10.6)                            | 109 (7.0)                                |         |
| Operating<br>room/recovery room                                      | 140 (4.9)          | 67 (5.1)                              | 73 (4.7)                                 |         |
| ICU <sup>b</sup>                                                     | 78 (2.7)           | 34 (2.6)                              | 44 (2.8)                                 |         |
| Other <sup>c</sup>                                                   | 258 (9.0)          | 105 (8.1)                             | 153 (9.8)                                |         |
| Daytime intubation, No. (%)                                          | 1887 (63.8)        | 838 (62.7)                            | 1049 (64.6)                              | .300    |
| Patient position, No. (%)<br>(n=2961)                                |                    |                                       |                                          | .001    |
| Supine                                                               | 1884 (63.6)        | 801 (59.8)                            | 1083 (66.8)                              |         |
| 30-45° head-up<br>position                                           | 642 (21.7)         | 333 (24.9)                            | 309 (19.1)                               |         |
| 20° head-up position                                                 | 284 (9.6)          | 130 (9.7)                             | 154 (9.5)                                |         |
| Beach chair                                                          | 65 (2.2)           | 32 (2.4)                              | 33 (2.0)                                 |         |
| Other <sup>d</sup>                                                   | 86 (2.9)           | 43 (3.2)                              | 43 (2.7)                                 |         |
| Total N° of operators, No. (%)<br>(n=2959)                           |                    |                                       |                                          | .210    |
| 1 operator                                                           | 1567 (53.0)        | 698 (52.2)                            | 869 (53.6)                               |         |
| 2-3 operators                                                        | 1198 (40.5)        | 561 (41.9)                            | 637 (39.3)                               |         |
| >3 operators                                                         | 194 (6.5)          | 79 (5.9)                              | 115 (7.1)                                |         |
| Operator performing the first<br>attempt, No. (%) (n=2962)           |                    |                                       |                                          | .321    |
| Resident                                                             | 1536 (51.9)        | 701 (52.4)                            | 835 (51.4)                               |         |
| Staff<br>physician/consultant                                        | 918 (31.0)         | 406 (30.3)                            | 512 (31.5)                               |         |

|                                                                                                    |                |                |                |      |
|----------------------------------------------------------------------------------------------------|----------------|----------------|----------------|------|
| Fellow                                                                                             | 411 (13.9)     | 195 (14.6)     | 216 (13.3)     |      |
| Medical student                                                                                    | 77 (2.6)       | 27 (2.0)       | 50 (3.1)       |      |
| Other <sup>e</sup>                                                                                 | 20 (0.6)       | 10 (0.7)       | 10 (0.6)       |      |
| Field of training of the operator performing the first attempt, No. (%) (n=2962)                   |                |                |                | .003 |
| Anesthesia                                                                                         | 1601 (54.0)    | 719 (53.7)     | 882 (54.3)     |      |
| Critical Care/Intensive Care                                                                       | 669 (22.6)     | 324 (24.2)     | 345 (21.3)     |      |
| Emergency Medicine                                                                                 | 334 (11.3)     | 120 (9.0)      | 214 (13.2)     |      |
| Internal Medicine                                                                                  | 136 (4.6)      | 65 (4.9)       | 71 (4.4)       |      |
| Pulmonary and Critical Care Medicine                                                               | 107 (3.6)      | 58 (4.3)       | 49 (3.9)       |      |
| Other <sup>f</sup>                                                                                 | 115 (3.9)      | 53 (4.0)       | 62 (3.8)       |      |
| N° of intubations/week of the operator of the 1 <sup>st</sup> attempt, No. (%) (n=2959)            |                |                |                | .075 |
| ≤ 1 intubations/week                                                                               | 763 (25.8)     | 367 (27.4)     | 396 (24.4)     |      |
| 2-5 intubations/week                                                                               | 1275 (43.1)    | 586 (43.8)     | 689 (42.5)     |      |
| 6-10 intubations/week                                                                              | 565 (19.1)     | 230 (17.2)     | 335 (20.7)     |      |
| 11- 20 intubations/week                                                                            | 264 (8.9)      | 117 (8.8)      | 147 (9.1)      |      |
| >20 intubations/week                                                                               | 92 (3.1)       | 37 (2.8)       | 55 (3.4)       |      |
| Operator performing the successful attempt <sup>g</sup> , No. (%) (n=256)                          |                |                |                | .330 |
| Staff physician/consultant                                                                         | 145 (56.6)     | 80 (59.7)      | 65 (53.3)      |      |
| Resident                                                                                           | 65 (25.4)      | 28 (20.9)      | 37 (30.3)      |      |
| Fellow                                                                                             | 44 (17.2)      | 25 (18.7)      | 19 (15.6)      |      |
| Other                                                                                              | 2 (0.8)        | 1 (0.7)        | 1 (0.8)        |      |
| Field of training of the operator performing the successful attempt <sup>g</sup> , No. (%) (n=256) |                |                |                | .568 |
| Anesthesia                                                                                         | 133 (52.0)     | 71 (53.0)      | 62 (50.8)      |      |
| Critical Care/ Intensive Care                                                                      | 84 (32.8)      | 47 (35.1)      | 37 (30.3)      |      |
| Emergency Medicine                                                                                 | 22 (8.6)       | 9 (6.7)        | 13 (10.7)      |      |
| Internal Medicine                                                                                  | 7 (2.7)        | 3 (2.2)        | 4 (3.3)        |      |
| Pulmonary and Critical Care Medicine                                                               | 7 (2.7)        | 0 (0.0)        | 3 (2.5)        |      |
| Other <sup>f</sup>                                                                                 | 3 (1.2)        | 0 (0.0)        | 3 (2.4)        |      |
| N° of intubations/week of the operator of the successful attempt <sup>c</sup> , No. (%) (n=256)    |                |                |                | .584 |
| ≤ 1 intubations/week                                                                               | 58 (22.7)      | 32 (23.9)      | 26 (21.3)      |      |
| 2-5 intubations/week                                                                               | 127 (49.6)     | 63 (47.0)      | 64 (52.5)      |      |
| 6-10 intubations/week                                                                              | 38 (14.8)      | 20 (14.9)      | 18 (14.8)      |      |
| 11- 20 intubations/week                                                                            | 21 (8.2)       | 14 (10.4)      | 7 (5.7)        |      |
| >20 intubations/week                                                                               | 12 (4.7)       | 5 (3.7)        | 7 (5.7)        |      |
| Laryngoscopy duration, minutes, median (IQR) (n=2947)                                              | 1.0 (1.0, 2.0) | 1.0 (1.0, 3.0) | 1.0 (1.0, 2.0) | .182 |

Abbreviations: IQR, interquartile range; ICU: intensive care unit; MET, medical emergency team; TI, tracheal intubation.

<sup>a</sup>For intubations performed in the intensive care unit.

<sup>b</sup>For intubations performed in medical or surgical wards; for intubations performed in ICU, this refer to other ICU of the same hospital.

<sup>c</sup>Other admission source include outpatient and other in-hospital areas.

<sup>d</sup>Other patient's position includes: ramp position, Trendelenburg (patient supine with feet elevated above the head level) and reverse-Trendelenburg (patient supine with head elevated above the feet level).

<sup>e</sup>Other operator performing the first attempt of intubation includes nurse and respiratory therapist.

<sup>f</sup>Other field of training for the operator performing intubation attempts includes: hematology/oncology, cardiology, pulmonary medicine and surgery.

<sup>g</sup>Calculated on the 256 patients with the operator performing the successful attempt different from the operator performing the first attempt.

**eTable 4. Outcomes distribution according to the geographical areas of participating centers.**

| Variable                                                | Europe<br>(N=1586) | North<br>America<br>(N=335) | South<br>America<br>(N=82) | Asia<br>(N=816) | Africa<br>(N=33) | Australia<br>and<br>New<br>Zealand<br>(N=112) |
|---------------------------------------------------------|--------------------|-----------------------------|----------------------------|-----------------|------------------|-----------------------------------------------|
| Major intubation related complication, No. (%)          | 770<br>(48.5)      | 159<br>(47.5)               | 39<br>(47.6)               | 317<br>(38.8)   | 10<br>(30.3)     | 45<br>(40.2)                                  |
| Cardiovascular instability, No. (%)                     | 664<br>(44.9)      | 149<br>(47.5)               | 33<br>(41.8)               | 275<br>(36.1)   | 10<br>(45.5)     | 41<br>(42.3)                                  |
| Systolic blood pressure < 65 mmHg                       | 113 (7.2)          | 14 (4.2)                    | 4 (4.9)                    | 22 (2.7)        | 0 (0.0)          | 4 (3.6)                                       |
| Systolic blood pressure < 90 mmHg for > 30 minutes,     | 147<br>(10.0)      | 33<br>(10.2)                | 6 (7.7)                    | 57 (7.3)        | 6<br>(20.0)      | 3 (2.7)                                       |
| New need/increase of vasopressors                       | 603<br>(38.0)      | 132<br>(39.4)               | 33<br>(40.2)               | 243<br>(29.8)   | 5<br>(15.2)      | 37<br>(33.0)                                  |
| Fluid bolus > 15 ml/Kg                                  | 81 (5.5)           | 25 (8.0)                    | 2 (2.5)                    | 37 (4.8)        | 2 (9.1)          | 4 (4.1)                                       |
| Cardiac arrest, No. (%)                                 | 45 (2.8)           | 11 (3.3)                    | 2 (2.4)                    | 33 (4.0)        | 0 (0.0)          | 2 (1.8)                                       |
| With return of spontaneous circulation                  | 26 (57.8)          | 11<br>(100.0)               | 2<br>(100.0)               | 8 (24.2)        | -                | 2<br>(100.0)                                  |
| With death                                              | 19 (57.8)          | 0 (0.0)                     | 0 (0.0)                    | 25<br>(75.8)    | -                | 0 (0.0)                                       |
| Reason:                                                 |                    |                             |                            |                 |                  |                                               |
| Hypovolemia/hemodynamic instability                     | 21 (46.7)          | 3 (30.0)                    | 0 (0.0)                    | 10<br>(30.3)    | -                | 0 (0.0)                                       |
| Hypoxia                                                 | 12 (26.7)          | 3 (30.0)                    | 2<br>(100.0)               | 5 (15.2)        | -                | 1 (50.0)                                      |
| Thrombosis (coronary or pulmonary)                      | 4 (8.9)            | 0 (0.0)                     | 0 (0.0)                    | 15<br>(45.5)    | -                | 0 (0.0)                                       |
| Hypo/hyperkalemia                                       | 2 (4.4)            | 1 (10.0)                    | 0 (0.0)                    | 0 (0.0)         | -                | 0 (0.0)                                       |
| Toxins                                                  | 2 (4.4)            | 0 (0.0)                     | 0 (0.0)                    | 0 (0.0)         | -                | 0 (0.0)                                       |
| Cardiac tamponade                                       | 2 (4.4)            | 0 (0.0)                     | 0 (0.0)                    | 1 (3.0)         | -                | 0 (0.0)                                       |
| Tension pneumothorax                                    | 1 (2.2)            | 0 (0.0)                     | 0 (0.0)                    | 0 (0.0)         | -                | 1 (50.0)                                      |
| Other                                                   | 1 (2.2)            | 3 (30.0)                    | 0 (0.0)                    | 2 (6.1)         | -                | 0 (0.0)                                       |
| Severe hypoxia (lowest SpO <sub>2</sub> < 80%), No. (%) | 169<br>(10.8)      | 20 (6.4)                    | 9 (11.0)                   | 63 (7.8)        | 3 (9.1)          | 8 (7.3)                                       |
| Secondary complications, No. (%)                        |                    |                             |                            |                 |                  |                                               |
| New onset cardiac arrhythmia                            | 90 (5.7)           | 18 (5.4)                    | 6 (7.3)                    | 44 (5.4)        | 6<br>(18.2)      | 3 (2.7)                                       |
| Atrial fibrillation                                     | 30 (33.3)          | 6 (33.3)                    | 0 (0.0)                    | 10<br>(22.7)    | 1<br>(16.7)      | 1 (33.3)                                      |
| Ventricular tachycardia                                 | 17 (18.9)          | 2 (11.1)                    | 1 (16.7)                   | 19<br>(43.2)    | 2<br>(33.3)      | 0 (0.0)                                       |
| Bradycardia                                             | 24 (26.7)          | 4 (22.2)                    | 2 (33.3)                   | 5 (11.4)        | 1<br>(16.7)      | 2 (66.7)                                      |
| Other                                                   | 19 (21.1)          | 6 (33.3)                    | 3 (50.0)                   | 10<br>(22.7)    | 2<br>(33.3)      | 0 (0.0)                                       |
| Aspiration of gastric contents, No. (%)                 | 61 (3.8)           | 13 (3.9)                    | 3 (3.7)                    | 24 (2.9)        | 11<br>(33.3)     | 4 (3.6)                                       |
| Dental injury, No. (%)                                  | 12 (0.8)           | 1 (0.3)                     | 0 (0.0)                    | 11 (1.3)        | 3 (9.1)          | 1 (0.9)                                       |
| Airway injury, No. (%)                                  | 4 (0.3)            | 7 (2.1)                     | 1 (1.2)                    | 6 (0.7)         | 2 (6.1)          | 1 (0.9)                                       |
| Tracheal laceration                                     | 1 (25.0)           | 1 (14.3)                    | 0 (0.0)                    | 2 (33.3)        | 0 (0.0)          | 1(100.0)                                      |
| Bronchial laceration                                    | 0 (0.0)            | 0 (0.0)                     | 0 (0.0)                    | 1 (16.7)        | 0 (0.0)          | 0 (0.0)                                       |
| Laryngeal laceration                                    | 2 (50.0)           | 1 (14.3)                    | 1<br>(100.0)               | 1 (16.7)        | 2<br>(100.0)     | 0 (0.0)                                       |
| Other                                                   | 1 (25.0)           | 5 (71.4)                    | 0 (0.0)                    | 2 (33.3)        | 0 (0.0)          | 0 (0.0)                                       |
| Pneumothorax, No. (%)                                   | 12 (0.8)           | 5 (1.5)                     | 1 (1.2)                    | 3 (0.4)         | 1 (3.0)          | 0 (0.0)                                       |
| Pneumomediastinum, No. (%)                              | 4 (0.3)            | 3 (0.9)                     | 0 (0.0)                    | 1 (0.1)         | 0 (0.0)          | 0 (0.0)                                       |

**eTable 5. Missing values for the study outcomes.**

| Variable                                                | Missing   |
|---------------------------------------------------------|-----------|
| Primary outcome (composite), No. (%)                    | 0 (0.0)   |
| Cardiovascular instability, No. (%)                     | 211 (7.1) |
| Systolic blood pressure < 65 mmHg                       | 11 (0.4)  |
| Systolic blood pressure < 90 mmHg for > 30 minutes,     | 169 (5.7) |
| New need/increase of vasopressors                       | 0 (0.0)   |
| Fluid bolus > 15 ml/Kg                                  | 204 (6.9) |
| Cardiac arrest, No. (%)                                 | 0 (0.0)   |
| Severe hypoxia (lowest SpO <sub>2</sub> < 80%), No. (%) | 48 (1.6)  |
| New onset cardiac arrhythmia                            | 4 (0.1)   |
| Aspiration of gastric contents, No. (%)                 | 4 (0.1)   |
| Esophageal intubation                                   | 5 (0.17)  |
| Dental injury, No. (%)                                  | 4 (0.1)   |
| Airway injury, No. (%)                                  | 5 (0.2)   |
| Pneumothorax, No. (%)                                   | 1 (0.0)   |
| Pneumomediastinum, No. (%)                              | 4 (0.1)   |

**eFigure 1. Incidence of peri-intubation major adverse events and other peri-intubation events.**

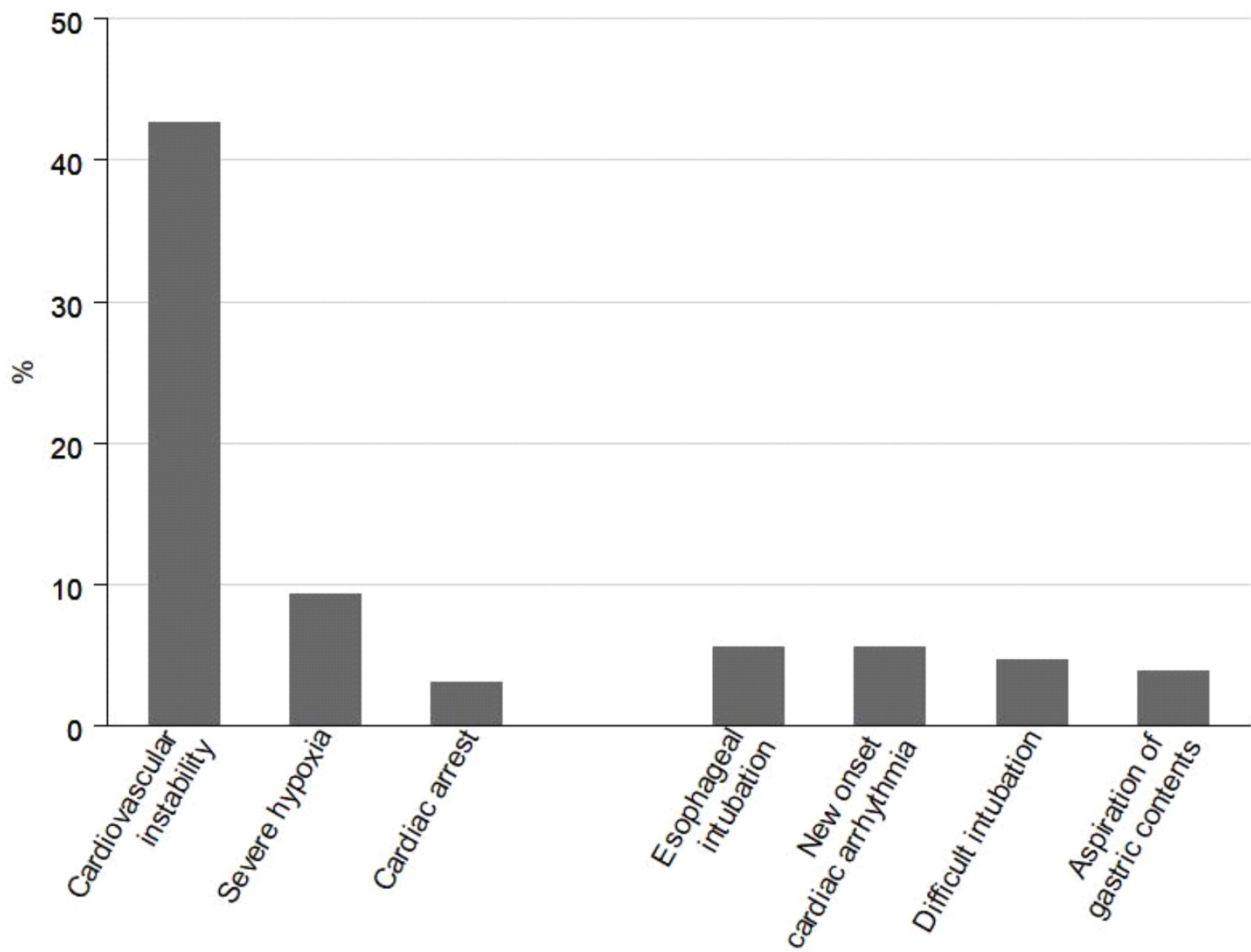

**eFigure 2. Incidence of peri-intubation adverse events according to the number of attempts: A, overall major complications; B, cardiovascular instability; C, cardiac arrest and D, severe hypoxia.**

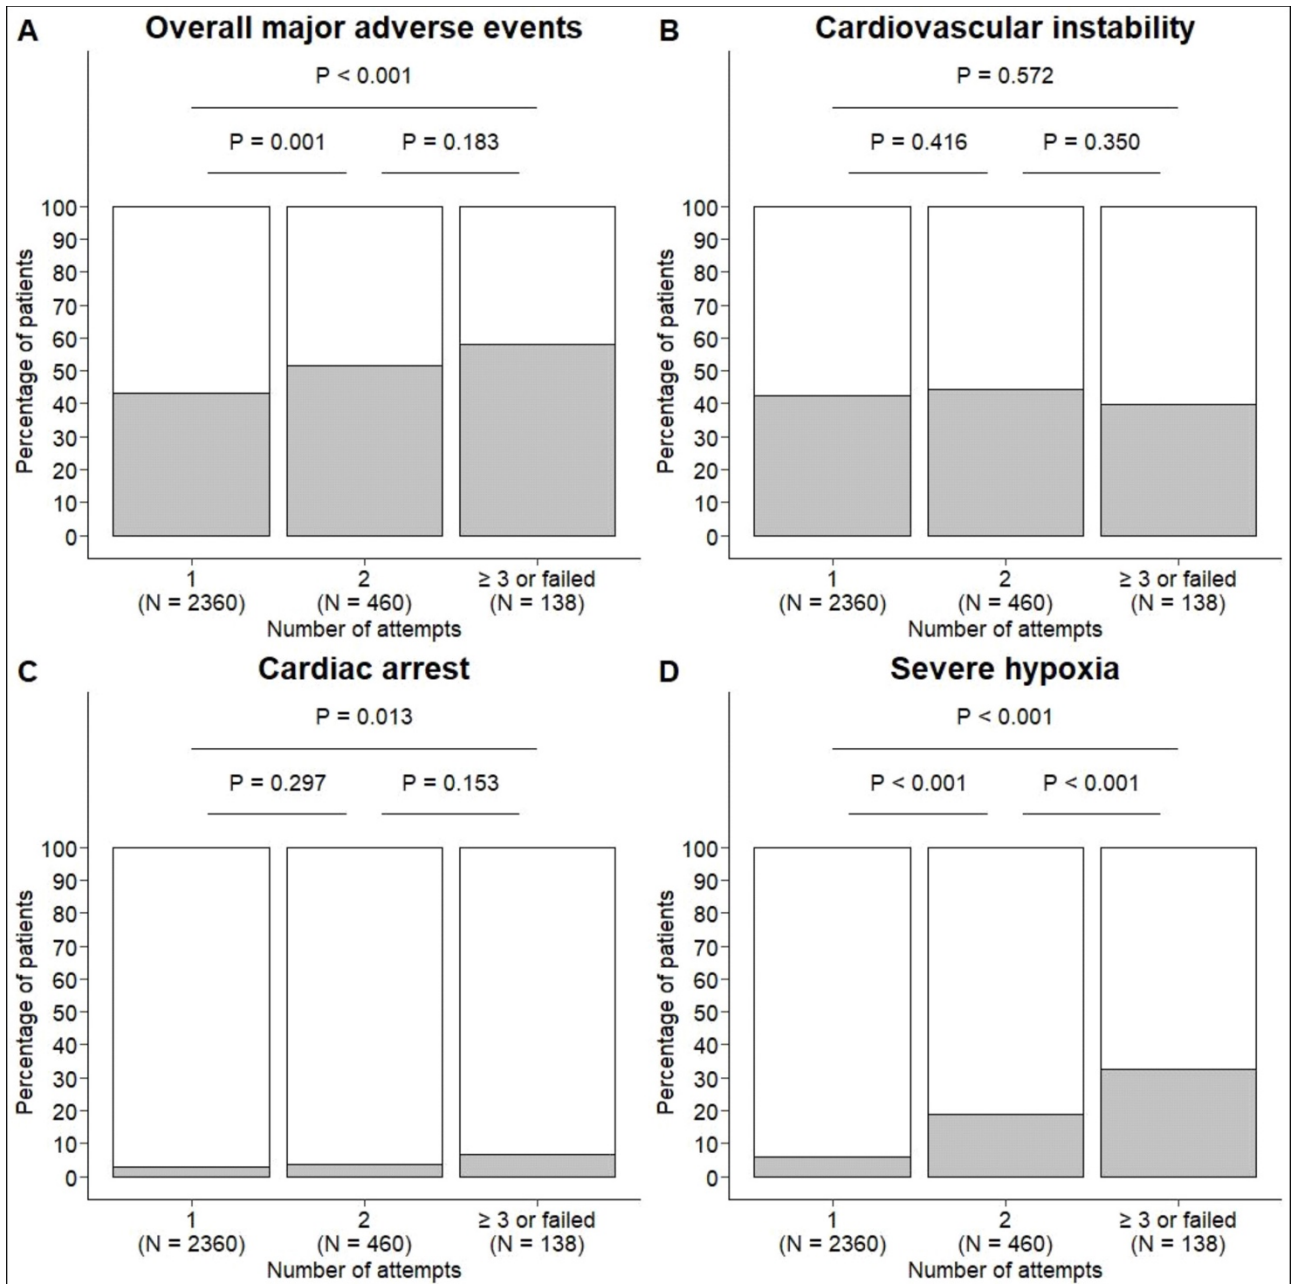

**eFigure 3. A, Kaplan-Meier survival curves by peri-intubation major adverse events. B, Kaplan-Meier survival curves by cardiovascular instability. C, Kaplan-Meier survival curves by cardiac arrest. D, Kaplan-Meier survival curves by severe hypoxia.**

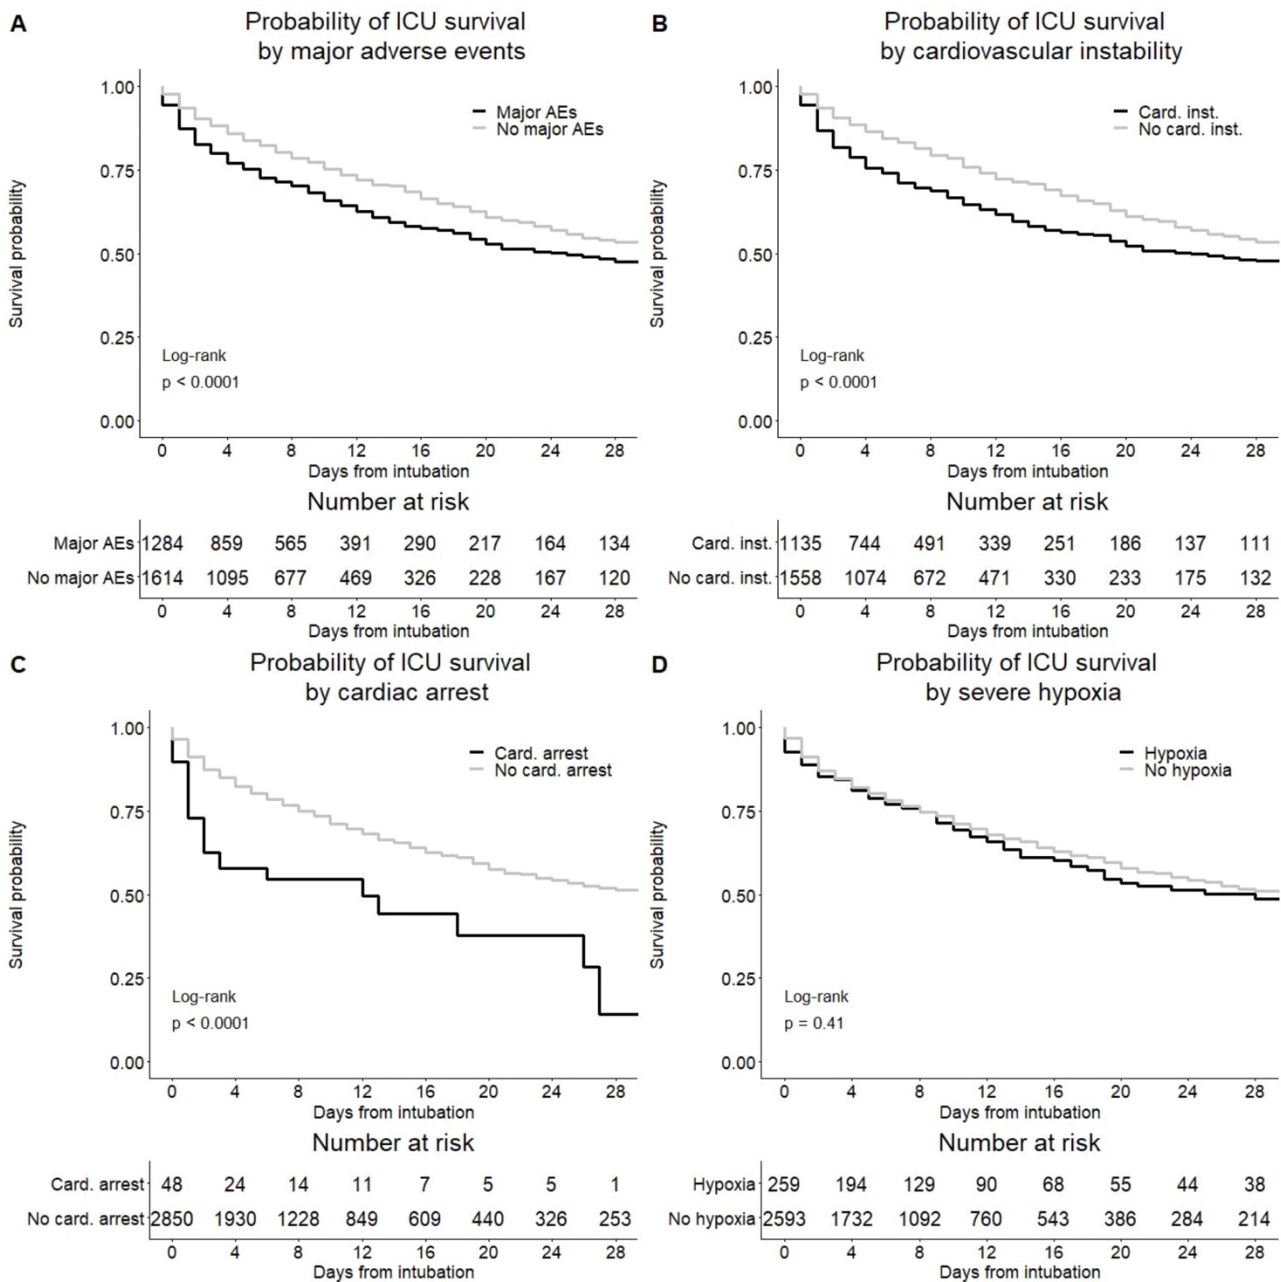

Abbreviations: AE, adverse events; card. arrest, cardiac arrest; card. inst., cardiovascular instability.



**eTable 6. Multivariable analysis of organizational, operator and patient factors associated with major peri-intubation adverse events.**

| Variable                                                  | Major AEs, No./Total No. (%) | Absolute Difference (95% CI) <sup>b</sup> | Multivariable OR (95% CI) <sup>a</sup> | P-value |
|-----------------------------------------------------------|------------------------------|-------------------------------------------|----------------------------------------|---------|
| Age (years)                                               | -                            | 4.0 (2.0, 6.0)                            | 1.012 (1.006, 1.019)                   | <.001   |
| BMI                                                       |                              |                                           |                                        |         |
| Normal weight                                             | 546/1254 (43.5)              | Reference                                 | 1 (Reference)                          |         |
| Underweight                                               | 72/151 (47.7)                | 4.2 (-4.7, 12.9)                          | 1.541 (0.947, 2.507)                   | .081    |
| Overweight                                                | 403/895 (45.0)               | 1.5 (-2.9, 5.8)                           | 0.963 (0.758, 1.225)                   | .761    |
| Obese or severe obese                                     | 312/646 (48.3)               | 4.8 (-0.09, 9.6)                          | 0.903 (0.691, 1.180)                   | .455    |
| Heart failure                                             |                              |                                           |                                        |         |
| No                                                        | 1189/2700 (44.0)             | Reference                                 | 1 (Reference)                          |         |
| Yes                                                       | 151/264 (57.2)               | 13.2 (6.7, 19.6)                          | 1.523 (1.064, 2.182)                   | .022    |
| Hematologic malignancy                                    |                              |                                           |                                        |         |
| No                                                        | 1249/2812 (44.4)             | Reference                                 | 1 (Reference)                          |         |
| Yes                                                       | 91/152 (59.9)                | 15.5 (7.1, 23.8)                          | 1.610 (1.013, 2.558)                   | .044    |
| Systolic blood pressure (mmHg)                            | -                            | -18.9 (-21.4, -16.4)                      | 0.991 (0.986, 0.995)                   | <.001   |
| Diastolic blood pressure (mmHg)                           | -                            | -10.4 (-11.8, -8.9)                       | 0.992 (0.983, 0.999)                   | .028    |
| Heart rate                                                | -                            | 2.9 (1.0, 4.8)                            | 1.006 (1.002, 1.010)                   | .006    |
| Reason for intubation                                     |                              |                                           |                                        |         |
| Neurological impairment                                   | 195/902 (32.7)               | Reference                                 | 1 (Reference)                          |         |
| Respiratory failure                                       | 778/1548 (50.3)              | 17.6 (13.5, 21.6)                         | 1.111 (0.851, 1.450)                   | .438    |
| Cardiovascular instability                                | 178/277 (64.3)               | 31.6 (24.9, 38.2)                         | 1.866 (1.218, 2.859)                   | .004    |
| Other reason                                              | 86/233 (36.9)                | 4.2 (-3.0, 11.4)                          | 1.104 (0.713, 1.710)                   | .658    |
| Receiving vasopressor/inotropic support before intubation |                              |                                           |                                        |         |
| No                                                        | 885/2195 (40.3)              | Reference                                 | 1 (Reference)                          |         |
| Yes                                                       | 455/769 (59.2)               | 18.9 (14.7, 23.0)                         | 0.919 (0.676, 1.251)                   | .593    |
| Pleural effusion                                          |                              |                                           |                                        |         |
| No                                                        | 1122/2561 (43.8)             | Reference                                 | 1 (Reference)                          |         |
| Yes                                                       | 218/403 (54.1)               | 10.3 (4.9, 15.7)                          | 1.241 (0.930, 1.656)                   | .142    |
| Patient position                                          |                              |                                           |                                        |         |
| Supine                                                    | 801/1884 (42.5)              | Reference                                 | 1 (Reference)                          |         |
| 30-45° head-up position                                   | 333/642 (51.9)               | 9.4 (4.8, 13.9)                           | 1.197 (0.902, 1.588)                   | .214    |
| 20° head-up position                                      | 130/284 (45.8)               | 3.3 (-3.2, 9.7)                           | 1.137 (0.795, 1.627)                   | .482    |

|                                               |                     |                      |                       |       |
|-----------------------------------------------|---------------------|----------------------|-----------------------|-------|
| Other position                                | 75/151<br>(49.7)    | 7.2 (-1.5, 15.8)     | 1.139 (0.705, 1.842)  | .595  |
| Place of intubation                           |                     |                      |                       |       |
| ICU                                           | 968/1992<br>(48.6)  | Reference            | 1 (Reference)         |       |
| Emergency department                          | 231/623<br>(37.1)   | -11.5 (-16.0, -7.0)  | 0.763 (0.568, 1.024)  | .072  |
| Ward                                          | 107/260<br>(41.2)   | -7.4 (-14.0, -0.9)   | 0.726 (0.499, 1.056)  | .094  |
| Other place <sup>c</sup>                      | 34/89<br>(38.2)     | -10.4 (-21.3, 0.5)   | 0.547 (0.281, 1.064)  | .075  |
| Use of propofol                               |                     |                      |                       |       |
| No                                            | 817/1734<br>(47.1)  | Reference            | 1 (Reference)         |       |
| Yes                                           | 523/1230<br>(42.5)  | -4.6 (-8.3, -0.9)    | 1.142 (0.907, 1.438)  | .259  |
| Use of succinylcholine                        |                     |                      |                       |       |
| No                                            | 1068/2318<br>(46.1) | Reference            | 1 (Reference)         |       |
| Yes                                           | 272/646<br>(42.1)   | -4.0 (-8.4, 0.4)     | 0.855 (0.652, 1.121)  | .256  |
| Full stomach                                  |                     |                      |                       |       |
| No                                            | 1027/2297<br>(44.7) | Reference            | 1 (Reference)         |       |
| Yes                                           | 238/457<br>(52.1)   | 7.4 (2.2, 12.5)      | 1.392 (1.040, 1.863)  | .026  |
| First pass success                            |                     |                      |                       |       |
| No                                            | 317/598<br>(53.0)   | Reference            | 1 (Reference)         |       |
| Yes                                           | 1020/2360<br>(43.2) | -9.8 (-14.4, -5.2)   | 0.587 (0.455, 0.758)  | <.001 |
| No of ICUs                                    | -                   | -0.2<br>(-0.4, -0.0) | 0.941 (0.881, 1.005)  | .071  |
| Total ICU beds                                |                     |                      |                       |       |
| < 10                                          | 126/252<br>(50.0)   | Reference            | 1 (Reference)         |       |
| 10-20                                         | 361/768<br>(47.0)   | -3.0 (-10.4, 4.4)    | 0.776 (0.480, 1.253)  | .299  |
| > 20                                          | 853/1944<br>(43.9)  | -6.1 (-12.9, 0.7)    | 0.877 (0.542, 1.419)  | .593  |
| Frequency of emergency intubations/week       | -                   | -1.0 (-1.0, 0.0)     | 0.984 (0.963, 01.006) | .156  |
| Field of training                             |                     |                      |                       |       |
| Other field                                   | 620/1361<br>(45.6)  | Reference            | 1 (Reference)         |       |
| Anesthesia and Intensive Care                 | 719/1601<br>(44.9)  | -0.7 (-4.3, 3.0)     | 0.929 (0.732, 1.177)  | .541  |
| Adjusted SOFA                                 | -                   | 2.0 (1.2, 2.0)       | 1.015 (0.985, 1.047)  | .325  |
| MACOCHA score <sup>d</sup>                    |                     |                      |                       |       |
| < 3                                           | 1118/2538<br>(44.1) | Reference            | 1 (Reference)         |       |
| ≥ 3                                           | 222/426<br>(52.1)   | 8.0 (2.8, 13.3)      | 1.234 (0.920, 1.657)  | .160  |
| SpO <sub>2</sub> at the end of preoxygenation | -                   | -1.0 (-2.0, -1.0)    | 0.994 (0.985, 1.004)  | .247  |
| Laryngoscopy                                  |                     |                      |                       |       |
| Direct with Macintosh or Miller blade         | 1082/2416<br>(44.8) | Reference            | 1 (Reference)         |       |
| Videolaryngoscopy                             | 245/505<br>(48.5)   | 3.7 (-1.2, 8.6)      | 1.358 (1.004, 1.838)  | .047  |
| Fluid bolus 30 min before intubation          |                     |                      |                       |       |

|                                                  |                    |                          |                      |       |
|--------------------------------------------------|--------------------|--------------------------|----------------------|-------|
| No                                               | 731/1762<br>(41.5) | Reference                | 1 (Reference)        |       |
| Yes                                              | 554/1065<br>(52.0) | 10.5 (6.7,<br>14.4)      | 1.257 (1.005, 1.572) | .045  |
| SpO <sub>2</sub> / FiO <sub>2</sub> <sup>c</sup> | -                  | -38.5 (-48.7, -<br>28.0) | 0.998 (0.997, 0.999) | <.001 |

Abbreviations: AEs, adverse events; ICU, intensive care unit.

<sup>a</sup>Model performed with 2015 patients with complete variables and SpO<sub>2</sub> < 98%.

<sup>b</sup>95% bootstrap confidence interval with 10000 replicates calculated on the difference of the median values and 95% confidence interval calculated on the difference of the mean values.

<sup>c</sup>With *other place* it was indicated in most cases cardiology, radiology, endoscopy and other interventional rooms.

<sup>d</sup>MACOCHA score is a predictive score of difficult intubations in intensive care unit. Its calculation includes the following items: Mallampati score III – IV (5 points), obstructive sleep apnea syndrome (2 points), reduced mobility of the cervical spine (1 point), limited mouth opening < 3 cm (1 point), coma (1 point), severe hypoxemia (1 point), non-anesthesiologist operator (1 point). It ranges from 0 (easy intubation) to 12 (very difficult intubation).

**eTable 7. Multivariable analysis of patient and operator factors associated with first pass intubation failure.**

| Variable <sup>a</sup>                  | Multivariable OR (95% CI) | P-value |
|----------------------------------------|---------------------------|---------|
| Short neck                             | 1.310 (0.945, 1.816)      | .105    |
| Mallampati III-IV                      | 1.553 (1.035, 2.332)      | .034    |
| Reduced mouth opening                  | 2.273 (1.559, 3.314)      | <.001   |
| Retrognathia                           | 1.813 (0.939, 3.503)      | .076    |
| Neck stiffness                         | 2.011 (1.308, 3.092)      | .001    |
| Need of cervical spine immobilization  | 1.634 (0.879, 3.040)      | .121    |
| Beard                                  | 1.772 (1.123, 2.794)      | .014    |
| High risk of full stomach              | 1.397 (1.039, 1.878)      | .027    |
| Large tongue                           | 1.500 (0.903, 2.494)      | .117    |
| Other difficulties                     | 1.906 (1.128, 3.219)      | .016    |
| Prognathism                            | 1.711 (0.444, 6.583)      | .435    |
| Facial trauma                          | 0.674 (0.260, 1.747)      | .417    |
| Past surgery/radiotherapy <sup>b</sup> | 6.830 (2.717, 17.170)     | <.001   |
| BMI                                    |                           |         |
| Normal weight                          | 1 (Reference)             |         |
| Underweight                            | 0.670 (0.392, 1.147)      | .144    |
| Overweight                             | 0.902 (0.698, 1.167)      | .433    |
| Obese or severe obese                  | 1.055 (0.784, 1.418)      | .725    |
| Laryngoscopy                           |                           |         |
| Direct with Macintosh or Miller blade  | 1 (Reference)             |         |
| Videolaryngoscopy                      | 0.597 (0.421, 0.847)      | .004    |
| Field of training                      |                           |         |
| Other field                            | 1 (Reference)             |         |
| Anesthesia and Intensive Care          | 0.533 (0.411, 0.691)      | <.001   |
| Operator performing the first attempt  |                           |         |
| Other operator                         | 1 (Reference)             |         |
| Staff Physician/Consultant             | 0.525 (0.397, 0.694)      | <.001   |
| Place of intubation                    |                           |         |
| ICU                                    | 1 (Reference)             |         |
| Emergency department                   | 1.045 (0.771, 1.416)      | .779    |
| Ward                                   | 1.110 (0.729, 1.689)      | .627    |
| Other place                            | 0.686 (0.311, 1.513)      | .350    |
| Degree of emergency of intubation      |                           |         |
| No delay                               | 1 (Reference)             |         |
| < 1 hour                               | 1.276 (1.002, 1.626)      | .049    |
| ≥ 1 hour                               | 1.007 (0.703, 1.442)      | .971    |

<sup>a</sup>Model performed with 2659 patients with complete variables.

<sup>b</sup>Surgery or radiotherapy performed on neck/airways.

**eTable 8. Adjusted ICU mortality.<sup>a</sup>**

| Variable                    | Multivariable OR (95% CI)   | P-value         |
|-----------------------------|-----------------------------|-----------------|
| <b>Major adverse events</b> | <b>1.517 (1.262, 1.825)</b> | <b>&lt;.001</b> |
| Age (years)                 | 1.025 (1.018, 1.031)        | <.001           |
| Sex                         |                             |                 |
| Female                      | 1 (Reference)               |                 |
| Male                        | 0.973 (0.807, 1.172)        | .773            |
| Heart failure               | 1.322 (0.963, 1.816)        | .085            |
| Hematologic malignancy      | 3.281 (2.223, 4.842)        | <.001           |
| Ischemic heart disease      | 1.162 (0.895, 1.510)        | .260            |
| Solid neoplasm              | 1.656 (1.262, 2.174)        | <.001           |
| SOFA <sup>a</sup>           | 1.136 (1.111, 1.162)        | <.001           |

Abbreviations: SOFA, sequential organ failure assessment.

<sup>a</sup>Model performed with 2899 patients with complete variables (mixed model with a random intercept for the site)

<sup>b</sup>SOFA score was calculated with values last available before intubation. For all SOFA scores for which data points were missing, the corresponding value and omitted and the denominator adjusted accordingly.

**eTable 9. Adjusted mortality at 28 days after intubation.<sup>a</sup>**

| Variable                    | Multivariable OR (95% CI)   | P-value         |
|-----------------------------|-----------------------------|-----------------|
| <b>Major adverse events</b> | <b>1.438 (1.191, 1.735)</b> | <b>&lt;.001</b> |
| Age (years)                 | 1.023 (1.017, 1.029)        | <.001           |
| Sex                         |                             |                 |
| Female                      | 1 (Reference)               |                 |
| Male                        | 0.974 (0.805, 1.178)        | .784            |
| Heart failure               | 1.381 (1.002, 1.902)        | .049            |
| Hematologic malignancy      | 3.175 (2.155, 4.677)        | <.001           |
| Ischemic heart disease      | 1.188 (0.911, 1.548)        | .204            |
| Solid neoplasm              | 1.732 (1.315, 2.282)        | <.001           |
| SOFA score <sup>a</sup>     | 1.136 (1.111, 1.162)        | <.001           |
|                             |                             |                 |
|                             |                             |                 |

Abbreviations: SOFA, sequential organ failure assessment.

<sup>a</sup>Model performed with 2899 patients with complete variables (mixed model with a random intercept for the site)

<sup>b</sup>SOFA score was calculated with values last available before intubation. For all SOFA scores for which data points were missing, the corresponding value and omitted and the denominator adjusted accordingly.

**eAppendix 1. List of endorsing Scientific Societies/Networks endorsing the study (alphabetical order):**

- Australian and New Zealand Intensive Care Society Clinical Trials Group (ANZICS CTG)
- Dutch Society of Intensive Care (NVIC)
- European Airway Management Society (EAMS)
- European Society of Intensive Care Medicine (ESICM)
- Hellenic Society of Cardiopulmonary Resuscitation
- Indian Society of Critical Care Medicine (ISCCM)
- Irish Critical Care – Clinical Trials Network (ICC - CTN)
- Protective Ventilation (Prove) Network
- Russian Federation of Anesthesiologists and Reanimatologists (FAR)
- Società Italiana Anestesia Analgesia Rianimazione e Terapia Intensiva (SIAARTI) – Gruppo di Studio Vie Aeree
- Society of Critical Care Medicine (SCCM) – Discovery Critical Care Research Network

**eAppendix 2: National Coordinators of INTUBE Study.**

**Australia and New Zeland:** David Brewster; **Canada:** Matteo Parotto; **France:** Jean Bapstiste Lascarrou; **Germany:** Kristaps Bokums; **Greece:** Athanasios Chalkias ; **India:** Sheila Nainan Myatra **Ireland:** John Laffey; **Italy:** Vincenzo Russotto; **Libya:** Muhammed Elhadi; **Poland:** Konstanty Szuldrzyński; **Russia:** Alexander Andreenko; **Sweden:** Christina Agvald Öhman; **United Kingdom:** Luigi Camporota, Andy Higgs; **US:** Philippe Bauer.



## **eAppendix3: List of INTUBE study investigators and participating centers**

**Data managers:** Emanuela Rossi (University of Milan – Bicocca, Monza, Italy), Davide Gaudesi (University of Milan – Bicocca, Monza, Italy).

**Monitors:** Valeria Meroni (University of Milan – Bicocca, Monza, Italy); Francesca Rabboni (University of Milan – Bicocca, Monza, Italy); Manuela Marotta (University of Milan – Bicocca, Monza, Italy).

**Statisticians:** Elena Tassistro (University of Milan – Bicocca, Monza, Italy), Laura Antolini (University of Milan – Bicocca, Monza, Italy).

### **Site investigators by country**

#### **AUSTRALIA**

Sir Charles Gairdner Hospital (Perth): Matthew Anstey, Sandra Colica; Cabrini Hospital (Malvern): David Brewster, Shannon Simpson; St John of God Murdoch Hospital (Murdoch Perth): Adrian Regli, Ross O'Grady; St John of God Subiaco Hospital (Subiaco): Edward Litton, Janet Ferrier; Redcliffe and Caboolture Hospitals (Redcliffe): Roland Bartholdy, Alexis Tabah; Nepean Hospital (Sydney): David Bowen; Royal North Shore Hospital (Sydney): Rebecca Rowley, Jonathan Gatward; The Prince Charles Hospital (Brisbane): Julio Alonso, Sneha Varkey; Bendigo Hospital (Bendigo): Vijayanand Palaniswamy, Timothy Chimunda.

#### **BANGLADESH**

Dhaka Medical College Hospital (Dhaka): Syed T. Reza; Mozaffer Hossain; Asgar Ali Hospital (Dhaka): Motiul Islam, Tarikul Hamid.

#### **CANADA**

University Health Network, Toronto General Hospital, PMCC CVICU (Toronto): Matteo Parotto, Samareh Ajami; Toronto General Hospital – MSICU (Toronto): Andrew Steel, Lorenzo Del Sorbo; Toronto Western Hospital – MSNICU (Toronto): Alberto Goffi, Ian Randall; Sunnybrook Health Sciences Centre (Toronto): Neill K.J. Adhikari, Tasneem H. Mehesry.

#### **CHILE**

Pontificia Universidad Católica de Chile (Santiago del Chile): Maria M. Vera, Guillermo Bugeo; Complejo asistencial Dr. Víctor Rios Ruiz (Los Angeles): Gonzalo Labarca, Monica Silva.

## **CHINA**

The First Affiliated Hospital of Guangzhou University of Chinese Medicine (Guangzhou City): Wuhua Ma, Yongxing Li; Zhongshan Hospital of Traditional Chinese Medicine (Zhongshan): Jiayan Wu, Lun Wu.

## **CROATIA**

University Hospital Centre Zagreb (Zagreb): Renata Curić Radivojević, Marijana Matas; University Hospital Centre Zagreb - Cardiothoracic ICU (Zagreb): Višnja Ivančan, Mario Pavlek; University Hospital Centre Zagreb - General Surgical ICU (Zagreb): Slobodan Mihaljević, Aleksandra Jumić; University Hospital Centre Zagreb - MET/ED (Zagreb): Mate Moguš, Iva Tucić.

## **CZECH REPUBLIC**

General University Hospital (Prague): Pavel Michalek, Marek Flaksa.

## **ECUADOR**

Hospital Vicente Corral Moscoso (Cuenca): Hernan Aguirre-Bermeo, Hugo Tirape-Castro; Clinica La Merced (Quito): Maria F. García Aguilera, Diana Alvarez Montenegro; Hospital de Especialidades Eugenio Espejo (Quito): Diego Morocho Tutillo, Jose A. Tutillo León

## **FRANCE**

Besancon University Hospital (Besancon): Hadrien Winiszewski, Gael Piton; Georges-Pompidou European University Hospital, AP-HP (Paris) – Medical ICU: Nadia Aissaoui, Jean-Loup Augy; Georges-Pompidou European University Hospital, AP-HP (Paris) – Surgical ICU: Benoit Champigneulle, Diane Zlotnik; Regional Hospital Center (Orléans): Grégoire Muller, Sophie Jacquier; University Hospital Center (Marseille): Sami Hraiech, Christophe Guervilly; District Hospital Center (Argenteuil): Gaetan Plantefevre, Damien Contou; Hôpital Louis Mourier (Colombes): Jean Damien Ricard, Sebastien Besset; District Hospital Center (La Roche Sur Yon): Gwenhael Colin, Caroline Pouplet; Hôpital Saint-Louis (Paris): Adrien Mirouse, Elie Azoulay; CHU Poitiers (Poitiers): Florence Boissier, Jean-Pierre Frat; CHRU Bretonneau (Tours): Emmanuelle Mercier, Charlotte Salmon-Gandonnière; University Hospital Center (Nantes): Jean-Baptiste Lascarrou, Maelle Martin; CH de Versailles (Le Chesnay): Alexis Ferre, Stephane Legriel; Groupe Hospitalier Saint Joseph (Paris): Cedric Bruel, Francois Philippard; Grand Hôpital de l'Est Francilien Sites de Marne-la-Vallée (Jossigny): Jonathan Zarka, Frank Chemouni; Hôpital Antoine Béclère (Clamart): Olfa Hamzaoui, Benjamin Sztrymf; CHU Besancon - Surgical ICU (Besancon): Yannick Brunin, Sébastien Pili-Floury; University Hospital of Clermont-Ferrand (Clermont-Ferrand): Jean-Michel Constantin, Thomas Godet; Hôpital Henri Mondor (Créteil): Tommaso Maraffi, Armand Mekontso Dessap, University Hospital Cochin (Paris): Mathieu

Jozwiak, Nathalie Marin; General Hospital Center (Le Mans): Christophe Guitton, Nicolas Chudeau; University Hospital of Bordeaux (Bordeaux): Alexandre Gros, Alexandre Boyer.

## **GERMANY**

University Hospital Duesseldorf (Duesseldorf): Kristaps Bokums, Detlef Kindgen-Milles; University Hospital of Bonn (Bonn): Christian Putensen, Stefan F. Ehrentraut; University Hospital Essen (Essen): Marcel Dudda, Oliver Kamp; Charité University Hospital (Berlin): Roland Francis, Kay Rumschuessel; University Hospital of Muenster (Muenster): Melanie Meersch, Mira Kuellmar; Charité Campus Mitte (Berlin): Roland Francis, Kay Rumschuessel.

## **GREECE**

General Hospital Agios Dimitrios (Thessaloniki): Eleni Papandreou, Athanasia Petsiou; Hippocraton General Hospital of Athens (Athens): Metaxia Papanikolaou, Aikaterini Kyparissi; Asklepieion Hospital of Voula (Athens): Maria Tileli, Alexandros Makris; Nikaia General Hospital (Nikaia): Dimitrios Tsiftsis, Nadia El-Fellah; General Hospital of Volos (Volos): Ilias Karametos, Evi Nakou; University Hospital of Larissa (Larissa): Athanasios Chalkias, Eleni Arnaoutoglou; General Hospital of Korinthos (Korinthos): Panagiotis Katsoulis, Sofia Pouriki; General Hospital of Athens "G. Gennimatas" (Athens): Kyriaki Vagdatli, Aikaterini Dimitropoulou.

## **INDIA**

Tata Memorial Hospital (Mumbai): Amol Kotheekar, Nishanth Baliga; MOSC Medical College (Kochi): Sara V. Korula, Sam Philip; Shri Ram Murti Smarak Institute of Medical Sciences (Bareilly): Lalit Singh, Nipun Agrawal; Criticare Hospital & Research Institute (Nagpur): Deepak Jeswani, Deepti Jeswani; Pushpawati Singhania Hospital & Research Institute (New Delhi): Simant Jha, Nitesh Singh; AMRI Hospital (Kolkata): Mahuya Bhattacharyya, Amit Das; Apollo Health City (Hyderabad): Swarna D. Kuragayala, Subba R. Kesavarapu; Care Institute of Medical Sciences (Ahmedabad): Bhagyesh Shah, Shuchi Kaushik; Bangalore Baptist Hospital (Bangalore): Nilu Sunil, Kingsly Gnanadurai; Institute of Medical Sciences (Varanasi): Atul K. Singh, Dinesh K. Singh; Shubh Hospital (Jaipur): Sudhir Khunteta, Kulbhusahn Gupta; Dishari Health Point (Malda): Rhik Sanyal, Abhirup Midya; Metro Hospitals & Heart Institute (Meerut): Vijay N. Tyagi, Prashant Bendre; Maxwell Janjeevan Hospital (Haridwar): Kumar Prashant, Satish Chaurasia; Ashwini Hospital (Cuttack): Prasanna Mishra, Sampat Dash; Pt. Jawahar Lal Nehru Memorial Medical College (Raipur): Omprakash Sundrani, Jaya Lalwani; CHL Hospital Indore (Indore): Nikhilesh Jain, Kehari Agrawal; Apollo Hospitals Bhubaneswar (Bhubaneswar): Banambar Ray, Ranjan Meher; Royalcare Super Speciality Hospitals (Coimbatore): Lakshmikanthcharan Saravanabavan, Satheesh Munusamy; Max Super Specialty Hospital (Vaishali): Manish Gupta, Meraj Ahmad; National Institute of Mental Health & Neurosciences (NIMHANS), (Bangalore): Kadarapura N. Gopalakrishna, Bharadwaj Suparna; Yashoda Hospital, Somajiguda (Hyderabad): Manimala R. Surath, Kartik Munta; Terna Specialty Hospital and Research Centre (Navi Mumbai): Bharat Jagiasi, Anand Srivastava; AMRI Hospitals (Bhubaneswar): Samir Sahu; Jaswantraai Superspeciality Hospital (Meerut): Vijay N. Tyagi, Prashant Bendre; Fortis Hospital Noida (Noida): Sircar

Mrinal, Singh Sujeet Kumar; Sir H.N Reliance Foundation Hospital (Mumbai): Mehul Shah, Mayur Patel; Tata Memorial Hospital – ICU (Mumbai): Shrirang Bamane, Amit Narkhede; Indraprastha Apollo Hospitals (New Delhi): Rajesh Chawla, Aakanksha Chawla; Mazumdar Shaw Medical Center (Bengaluru): Harish Mallapura Maheshwarappa, Ramya Ballekatte Manjunath.

## **IRELAND**

Galway University Hospital (Galway): Lua Rahmani, John G. Laffey.

## **ITALY**

University Hospital San Gerardo, ASST Monza (Monza): Roberto Rona, Annalisa Benini, Vincenzo Russotto; Ospedale Belcolle (Viterbo): Annalisa Rundo, Annalisa Luzi; Azienda Ospedaliera dei Colli, Monaldi Hospital (Napoli): Clelia Esposito, Moana R. Nespoli; IRCCS Humanitas Research Hospital, (Rozzano, MI): Andrea Pradella, Ramona Lungu; ASL Salerno, P.O. Maria SS Addolorata, (Eboli, SA): Laura Baccari, Fernando Chiumiento; Azienda Ospedaliera Universitaria Ospedali Riuniti Foggia, (Foggia): Karim Mariano, Antonella Cotoia; San Bortolo Hospital (Vincenza): Silvia De Rosa, Elisa Boni; Azienda Ospedaliera Universitaria Ruggi Salerno (Salerno): Salvatore Palmese, Renato Gammaldi; Azienda Ospedaliero Universitaria di Ferrara (Ferrara): Savino Spadaro, Lida Santoro; Arnas Ospedale Civico Di Cristina Benfratelli (Palermo): Andrea N. Cracchiolo, Daniela M. Palma; ASST Grande Ospedale Metropolitano Niguarda, Anestesia e Rianimazione 1 (Milano): Riccardo Pincioli, Ilaria Giovannini; ASL Toscana Centro Ospedale San Giuseppe (Empoli): Italo Calamai, Rosario Spina; Ospedale Santo Stefano (Prato): Iacopo Cappellini, Lorenzo Tutino; ARNAS Garibaldi (Catania): Agrippino Bellissima, Jessica G. Maugeri; ASST - Papa Giovanni XXIII (Bergamo): Ivano Riva, Fabrizio Fabretti; A.O.U. Città della Salute e della Scienza di Torino - AR1U - CAR Rianimazione Universitaria (Torino): Luca Brazzi, Gabriele Sales; A.O.U. Città della Salute e della Scienza di Torino - AR1U - PSAR Rianimazione di PS (Torino): Giorgia Montrucchio, Alberto Orsello; A.O.U. Città della Salute e della Scienza di Torino - AR1U – Cardiorianimazione (Torino): Andrea Costamagna, Federico G. Canavosio; National Cancer Institute of Rome Regina Elena (Roma): Lorella Pelagalli, Maria E. Marcelli; University Hospital Policlinico Paolo Giaccone (Palermo): Andrea Cortegiani, Jacopo Tramarin; ASO S. Croce e Carle (Cuneo): Stefania Musso, Stefano Tarantino; S.Orsola-Malpighi University Hospital (Bologna): Ida Di Giacinto, Anna L. Licciardi; Fondazione Policlinico Universitario A. Gemelli IRCCS (Roma): Luca Montini, Gennaro De Pascale; Azienda Ospedaliera di Perugia (Perugia): Angelo Giacomucci, Pierpaolo Russo; Magna Graecia University of Catanzaro (Catanzaro): Federico Longhini, Eugenio Garofalo; Azienda Sanitaria Universitaria Integrata di Trieste (Trieste): Massimo Ferluga, Valeria Moro; Istituto Nazionale Tumori. IRCCS Fondazione Pascale (Napoli): Marco Cascella, Barbara Di Caprio; Grande Ospedale Metropolitano Niguarda – Emergency Department (Milano): Raffaele Di Fenza, Francesca Nespoli; Santa Maria delle Croci Hospital (Ravenna); ASST Nord Milano - Ospedale E. Bassini (Milano): Stefano Muttini, Angelo Pezzi.

## **LIBYA**

University Hospital of Tripoli, Faculty of Medicine - University of Tripoli (Tripoli): Muhammed Elhadi, Abo Selim Trauma Hospital (Tripoli): Mohamed Ghula, Hazem Abdelkarem Ahmed; Alkhums Hospital (Alkhums): Soad Imhmed Alkhumsi; Sabha Medical Center (Sabha): Ala Khaled; Alzawia Hospital (Al-Zawia): Ahmed Elhadi, Abdulmueti Alhadi.

## **MALAYSIA**

Universiti Sains Malaysia (Kota Bharu): Mohd Z. Mazlan, Wan Mohd N. Wan Hassan; University Malaya Medical Centre (Kuala Lumpur): Shahnaz Hasan, Muhamad F.H. Jamaluddin; Hospital Kuala Krai (Kuala Krai): Noryani Mohd Samat, Muhamad A. Ismail; Hospital Sibul (Sibu): Anita Alias, Ngu Pei Hwa; Hospital Melaka (Melaka): Ismail Nahla Irtiza, Hapiz Khalidah; Hospital Tengku Ampuan Rahimah (Selangor): Lee Chew Kiok, Norbaniza Mohd Nordin; Hospital Raja Perempuan Zainab II (Kota Bharu): Wan N. Wan Ismail, Mohd N. Ali

## **MEXICO**

Hospital Especialidades "Antonio Fraga Mouret" Centro Medico Nacional La Raza IMSS (Mexico City): Luis Sánchez-Hurtado, Otoniel Toledo-Salinas; Trauma and Orthopedics Hospital Number 21, Social Security Mexican Institute (Monterrey): Antonio Landaverde, Miguel A. Sosa; General Hospital Zone No.1. San Luis Potosi, México. Mexican Institute Social Security (San Luis Potosi): Mayra Martinez Gonzalez; General Hospital Zone No. 48. Mexico City, Mexico. Mexican Institute Social Security (Mexico City): Claudia L. Lopez Nava, Nandyelly San Juan Roman; General Hospital Zone No.1. Tlaxcala, México. Mexican Institute Social Security (Tlaxcala): Maria Gonzalez, Missael Espinoza; General Hospital Zone No. 1A, Mexico City, Mexico. Mexican Institute Social Security (Mexico City): Daira González, Fernando Flores; Hospital General de Zona 14, Instituto Mexicano del Seguro Social (Hermosillo): Jesus N. Pantoja Leal, Luis R. Loza Gallardo.

## **NEW ZEALAND**

Wellington Hospital (Wellington): Paul Young, Ravi Mistry; Nelson Hospital (Nelson): Alexander Browne, Petra Crone.

## **OMAN**

Royal Hospital (Muscat): Juhi Chandwani, Sazzad Hossein;

## **PAKISTAN**

Pakistan Institute of Medical Sciences (Islamabad): Salman S. Koul, Rubina Aman; Pakistan Institute of Medical Sciences -Surgical ICU (Islamabad): Syed M. Ali, Shazia N. Akhtar.

## **POLAND**

University Hospital in Krakow (Krakow): Milosz Jankowski, Piotr Bielanski; Ludwik Rydygier Memorial Specialized Hospital (Krakow): Wojciech Mudyna, Pawel Franczyk; Wojewodzki Szpital Zespolony Bialystok (Bialystok): Piotr Galkin, Lukasz Skowronski; Medical University of Lodz (Lodz): Tomasz Gaszynski, Mariusz Piegat.

## **PORTUGAL**

Centro Hospitalar do Médio Tejo (Abrantes): Nuno Catorze, Marcia Pinto; Centro Hospitalar de Entre o Douro e Vouga (Santa Maria da Feira): Tiago Leonor, Marco Fernandes; Centro Hospitalar do Porto (Porto): Patricia Campos, Irene Aragão; ULSCB - Hospital Amato Lusitano (Castelo Branco): Paulo F. Costa, Daniela G. Franco; Centro Hospitalar de Vila Nova de Gaia/ Espinho (Vila Nova de Gaia): Marta Basto, Carla Nogueira; Centro Hospitalar Lisboa Ocidental (Lisboa): Rui P. Cunha, Vasco Costa.

## **RUSSIA**

E. Meshalkin National Medical Research Center (Novosibirsk): Vladimir Lomivorotov, Artem Nikitenko; Privolzhskiy District Medical Center (Nizhny Novgorod): Vladislav Belsky, Mikhail Furman; City Clinical Hospital n.a. Nikolay Pirogov (Moscow): Marat Magomedov, Vera Baturova; North-Western State Medical University named after I.I. Mechnikov (St. Petersburg): Alexey Karelov, Nadezhda Marova.

## **SAUDI ARABIA**

Prince Sultan Military Medical City (Riyadh): Ghaleb Almekhlafi, Adnan Alghamdi.

## **SPAIN**

Hospital La Paz (Madrid): Emilio Maseda, Alejandro Suarez de la Rica; Hospital General de Jerez (Jerez): Jesus Flores Gonzalez, Miryam Pérez Ruiz; Vall d'Hebron University Hospital (Barcelona): Oriol Roca, Manel Santafe; Hospital Parc Taulí (Sabadell): Gemma Goma Fernandez; Hospital Universitario Marqués de Valdecilla (Santander): Patricia Escudero-Acha, Alejandro González-Castro.

## **SWEDEN**

Karolinska University Hospital Huddinge (Huddinge): Christina Agvald-Öhman, Lina Broman; Kristianstad Hospital (Kristianstad): Martin Spangfors, Katrin Hannesdottir; AnOplva, Karlstad Centralsjukhus (Karlstad): Elin Persson, Jon Rosell; Centre for Clinical Research Sörmland (Eskilstuna): Jesper Sperber, Annika Ohlsson; Uppsala - Centrala intensivvårdsavdelningen - General Intensive Care Unit (Uppsala): Magnus Von Seth, Niccolò Pedrotti; Hallands Sjukhus Varberg (Varberg): Carl Wahlstrom, Maria Meirik; Region Gävleborg – Gävle (Gävle): Anna Bandert, Ditte Krog.

## **TAIWAN**

National Taiwan University Hospital - Medical ICU (3A2), (Taipei): Lu-Cheng Kuo, Ming-Hann Shin; National Taiwan University Hospital - Medical ICU (3C), (Taipei): Jung-Yien Chien, Shih-Chi Ku; National Taiwan University Hospital - Medical ICU (6PE), (Taipei): Sheng-Yuan Ruan, Chun-Kai Huang; National Taiwan University Hospital - General Surgery ICU, (Taipei): Yu-Chang Yeh, Anne Chao; National Taiwan University Hospital - Neurosurgery ICU (Taipei): Kuo-Chuan Wang, Ching-Tang Chiu; National Taiwan University Hospital - ED ICU (Taipei): Jien Zhang Lee, Nai-Kuan Chou.

## **UNITED KINGDOM**

Royal Gwent Hospital (Newport): Tamas Szakmany, Benjamin Jones; Nevill Hall Hospital (Abergavenny): Laura Jones; West Suffolk NHS Foundation Trust (Bury St Edmunds): Valentina Della Torre, Ayush Sinah; Royal United Hospital (Bath): Alice Quayle, Olivia Cheetham; St Heliers University Hospital (London): Yadullah Syed, Kwabena Mensah; Aberdeen Royal Infirmary (Aberdeen): Christopher Edmunds, Callum T. Kaye.

## **UNITED STATES**

Mayo Clinic, Methodist Campus (Rochester): Philippe R. Bauer, Yewande E. Odeyemi; MD Anderson Cancer Center - University of Texas (Houston): Joseph Nates, Andres Laserna; University of Arizona (Tucson): Jarrod Mosier, Cameron Hypes; North Shore University Hospital, Northwell Health (Manhasset): Eric Gottesman, Fiore Mastroianni; Montefiore Medical Center (New York): Daniel G. Fein, Dawn Zhao; Mayo Clinic Saint Mary's Campus (Rochester): Xavier E. Fonseca Fuentes, Alice Gallo de Moraes; Mayo Clinic Hospital - Emergency Department (Rochester): Benjamin J. Sandefur, Philippe R. Bauer; Oregon Health & Science University (Portland): Akram Khan, Dubier Matos; NYU Langone Medical Center (New York): David A. Kaufman, Andrew Lehr; Tufts Medical Center (Boston): Luca Bigatello, Iwona Bonney.

## **eAppendix 4. Study protocol**

### **INternational observational study To Understand the impact and BEst practices of airway management in critically ill patients**

**Study acronym identifier:** INTUBE

**Trial registration:** [clinicaltrials.gov](https://clinicaltrials.gov) Identifier: NCT03616054

**Steering committee:**

Vincenzo Russotto (Monza, Italy)

Giacomo Bellani (Monza, Italy)

Giuseppe Foti (Monza, Italy)

Roberto Fumagalli (Milan, Italy)

Antonio Pesenti (Milan, Italy)

Paolo Pelosi (Genoa, Italy)

Luigi Camporota (London, UK)

Philippe R Bauer (Rochester, USA)

Konstanty Szuldrzynski (Kracow, Poland)

Sheila Nainan Myatra (Mumbai, India)

Massimiliano Sorbello (Catania, Italy)

John Laffey (Galway, Ireland)

Robert Greif (Bern, Switzerland)

Andy Higgs (Warrington, UK)



## Rationale

Tracheal intubation in critically ill patients is a potentially life-threatening procedure and approximately one-third of intubations are complicated by severe hypoxia, cardiovascular collapse and cardiac arrest [1,2]. Critically ill are prone to severe complications as the consequence of the underlying acute respiratory failure or hemodynamic instability, reduced oxygen stores and increased oxygen consumption [1,3]. Moreover, the rate of difficult airway management may be higher in the intensive care unit (ICU) and in the Emergency Department, prolonging the apnea time and the risk of desaturation [4]. Finally, operator's skills, procedures, devices and drugs, among others, may influence airway management success and patient's outcome [5]. Despite the high risk of the procedure, different interventions lack high-quality evidence and we hypothesize that a heterogeneous practice among different centers and geographical areas may be found [6,7].

The primary aim of our study is to evaluate the incidence of intubation-related adverse events in critically ill patients. Secondary aim is to evaluate current clinical practices on airway management in the in-hospital critical care setting.

## **METHODS**

### ***Study design***

Prospective observational multi-center international cohort study.

### ***Recruitment***

We aim at recruiting for participation both academic and non-academic hospitals worldwide. We launched a website: [www.intubestudy.com](http://www.intubestudy.com) where we will publish study information and documents (e.g. protocol, case report form, national coordinator list) which will be available for potentially interested investigators. From the website, it will be possible to complete a form for center and local coordinator(s) data collection. The project will be presented and a call for centers will be announced during international meetings of intensive care. We will also apply for receiving the endorsement of international scientific societies in order to promote and enhance participation to this study.

### ***Inclusion criteria***

We will include all adult ( $\geq 18$  years old) critically ill patients undergoing intubation during the period of observation. We will consider all in-hospital intubations. We will define critically ill those patients with a life-threatening condition requiring intubation for either respiratory failure or airway protection.

### ***Exclusion Criteria***

- Intubation performed in the out-of-hospital setting
- Intubation in patients with cardiac arrest
- Intubation performed only for anesthesia (during either diagnostic/endoscopic or surgical procedures)

### ***Primary outcome***

At least one of the following (composite outcome):

- Severe hypoxemia ( $SpO_2 < 80\%$ ) occurring within 30 minutes from intubation
- Cardiac arrest occurring within 30 minutes from intubation
- Cardiovascular collapse (at least one of the following), occurring within 30 minutes from intubation:
  - Systolic blood pressure  $< 65$  mmHg recorded 1 time
  - Systolic blood pressure  $< 90$  mmHg for  $> 30$  minutes
  - New need of vasopressors/their increase and/or fluid bolus  $> 15$  ml/kg to maintain the target blood pressure.

### ***Secondary outcomes***

- Difficult intubation ( $> 2$  laryngoscopy attempts)
- Cannot intubate cannot oxygenate scenario (CICO)
- Emergency front of neck airway (FONA)
- Cardiac arrhythmia occurring within 30 minutes from intubation
- Aspiration of gastric contents (time frame: 24 hours)
- Esophageal intubation
- Pneumothorax/pneumo-mediastinum (time frame: 24 hours)
- Dental injury (time frame: 24 hours)
- Airways injury (time frame: 24 hours)
- Mortality at ICU-discharge

## Data collection

We will collect the following information:

- Informed consent and admission data
- Demographic and clinical characteristics
- Monitoring applied during the procedure
- Reason for intubation/re-intubation
- Ongoing respiratory support before intubation (standard nasal cannula, high-flow nasal cannula, facemask O<sub>2</sub>, Venturi system, CPAP, noninvasive positive pressure ventilation)
- Patient's parameters and gas exchange (last available before preoxygenation start): (arterial pressure, heart rate, SpO<sub>2</sub>, vasopressor use, need of fluids administration and total volume, blood gas analysis, GCS, urine output, electrolytes, creatinine and bilirubin levels)
- Chest X-ray findings (if available)
- Operator's specialty, training level and number of tracheal intubations performed in a week (for both the operator performing the first and the operator of the successful attempt of intubation, if different)
- Characteristics of intubation (anticipated difficult airway management, degree of emergency)
- Intubation procedure (position during preoxygenation, rapid sequence induction)
- Preoxygenation method and use of apneic oxygenation
- SpO<sub>2</sub> at the end of preoxygenation
- Drugs used for induction (molecules and dosages)
- Elective method for laryngoscopy
- Method used for the successful attempt
- Method used for adequate tube placement confirmation
- Duration of laryngoscopy
- Total number of attempts, laryngoscopy view, failed intubation and rescue strategy
- Lowest SpO<sub>2</sub> registered during the procedure, lowest systolic and diastolic blood pressures within 30 minutes from intubation, new start of vasopressors/inotropes or their increase within 30 minutes from intubation, cardiac arrest within 30 minutes from intubation)
- Any supraventricular/ventricular arrhythmia (within 30 minutes from intubation), aspiration of gastric contents (detected during the first 24 hours), esophageal intubation, dental injury (detected during the first 24 hours), airway injury and pneumothorax/pneumomediastinum (detected during the first 24 hours).
- Status at ICU discharge (dead, alive, transferred).

Local investigators are expected to transcribe all collected data into an electronic CRF (eCRF, Research Electronic Data Capture – RedCap). Each local investigator will be trained on how to use the eCRF and will receive a personalized username and password. Each patient will be coded through a patient identification number generated by the eCRF and no patient names or initials will be present on the paper CRF. Data will be handled confidentially and the paper CRF will be stored behind a lock at each local site. Any source of information which may allow to link a record with a patient will be destroyed at the end of the monitoring phase.

## **Sample size**

Our aim is to collect data from at least 1000 major adverse events from airway management. The reported incidence of at least one major intubation-related complication (severe hypoxia, hemodynamic collapse, cardiac arrest) is approximately 28% [1]. Therefore, we plan to collect data from 3600 intubations. Intubation rate may vary from 0.5 to 2 tracheal intubations/day according to different centers (e.g. total hospital beds, number of ICUs and ICU beds) and local policies. In order to avoid over representation from centers with a higher admission rate, the total number of enrolled patients was limited to the first 20 consecutive cases during an 8-week observation period. A maximum time window of 8 weeks will be allowed for each center. Each center will select a start date for recruitment from 1 October to 31 July 2019. We plan to recruit at least 180 centers worldwide to achieve our sample goal.

## **Statistical analysis**

We will report mean and standard deviation of normally distributed variables and we will compare them using the student T-test. We will report non-normally distributed variables as median and interquartile range, comparing them using the Mann-Whitney U test. Categorical variables will be expressed as proportion and compared using the Chi-square or Fisher exact test as appropriate. We will perform a univariable analysis to identify variables associated with the composite outcome of major intubation-related complication and significant variables will be then used to construct a multivariable logistic model in order to identify independent variables. A two-sided p-value < 0.05 will be considered statistically significant.

## **Publication and authorship policy**

The main results of INTUBE study will be published in a peer-reviewed international medical journal. Authorship policy will follow the International Committee of Medical Journal Editors (ICMJE) recommendations. Authorship will be considered based on contributions to recruitment of patients, data acquisition and cleaning, analysis and interpretation of the data, manuscript writing, submission of national/local grants AND final approval of the version to be published AND agreement to be accountable for all aspects of the work, in ensuring that questions related to the accuracy or integrity of any part of the work are appropriately investigated and resolved. Members of the Steering Committee will be part of the Writing Committee and listed as Authors. National Coordinators and particularly committed investigators fulfilling the previously exposed criteria will be part of the Writing Committee. Each center will designate a maximum of two local coordinators who will provide scientific and structural leadership in their centers. They will ensure that all local necessary ethical and regulatory approvals are obtained before start of patient inclusion. Local coordinators will guarantee the integrity of data collection and ensure timely completion of CRFs. Local coordinators will be listed as study collaborators.

## Secondary analyses

After publication of the primary results, on request, the pooled dataset will be available for all investigators for secondary analyses, after judgment and approval of scientific quality and validity by the Steering Committee.

Before submission, the final version of all manuscripts related to the INTUBE study dataset must be approved by the Steering Committee. The members of the Writing Committee will be authors of the publications derived from the INTUBE study dataset.

## eReferences

1. Jaber S, Amraoui J, Lefrant J-Y, Arich C, Cohendy R, Landreau L, et al. Clinical practice and risk factors for immediate complications of endotracheal intubation in the intensive care unit: A prospective, multiple-center study\*. *Crit. Care Med.* 2006;34:2355–61.
2. Russotto V, Cortegiani A, Raineri SM, Gregoretti C, Giarratano A. Respiratory support techniques to avoid desaturation in critically ill patients requiring endotracheal intubation: A systematic review and meta-analysis. *J Crit Care.* 2017;41:98–106.
3. Mosier JM, Hypes CD, Sakles JC. Understanding preoxygenation and apneic oxygenation during intubation in the critically ill. *Intensive Care Med.* Springer Berlin Heidelberg; 2017;43:226–8.
4. Martin LD, Mhyre JM, Shanks AM, Tremper KK, Kheterpal S. 3,423 emergency tracheal intubations at a university hospital: airway outcomes and complications. *Anesthesiology.* The American Society of Anesthesiologists; 2011;114:42–8.
5. Jaber S, Jung B, Corne P, Sebbane M, Muller L, Chanques G, et al. An intervention to decrease complications related to endotracheal intubation in the intensive care unit: a prospective, multiple-center study. *Intensive Care Med.* 2010;36:248–55.
6. Higgs A, Cook TM, McGrath BA. Airway management in the critically ill: the same, but different. *British Journal of Anaesthesia.* 2016;117 Suppl 1:i5–i9.
7. Myatra SN, Shah A, Kundra P, Patwa A, Ramkumar V, Divatia JV, et al. All India Difficult Airway Association 2016 guidelines for the management of unanticipated difficult tracheal intubation in adults. *Indian J Anaesth.* 2016;60:885–98.

**eAppendix 5. Case report form.**

**INternational observational study To Understand the impact and BEst practices of airway management in critically ill patients**

Study acronym identifier: INTUBE

**CASE REPORT FORM**

**SITE INFORMATION** (to be completed only with screening of the 1<sup>st</sup> patient)

Centre ID number: \_\_\_\_\_

Local Principal Investigator's first name \_\_\_\_\_

Local Principal Investigator's last name \_\_\_\_\_

Local (2nd) Investigator's first name \_\_\_\_\_

Local (2nd) Investigator's last name \_\_\_\_\_

Type of hospital

Academic/University

Non academic

Is your hospital a trauma centre (i.e. referral centre for trauma in your geographical area)?

YES

NO

Is a Medical Emergency Team (MET) present in your hospital?

(A team alerted in case of deterioration of one or more vital sign)

YES

NO

Is a protocol for airway management in critically ill patients present in your hospital?

YES

NO

Is an emergency airway management checklist present in your hospital?

YES

NO

Is a difficult airway trolley routinely present in your hospital (at the intubation site)?

YES

NO

How many intensive care units (ICUs) do you have in your hospital? \_\_\_\_\_

How many (total) ICU beds do you have in your hospital? \_\_\_\_\_

How many endotracheal intubations in critically ill patients are approximately performed in your hospital (ICU, ED, ward areas) in a week? \_\_\_\_\_

## SCREENING

### Inclusion criteria

Is patient's age equal or higher than 18 years?

- YES
- NO

Is the patient critically ill?

(i.e. with a life-threatening condition requiring endotracheal intubation for cardio-respiratory failure and/or airway protection)

- YES
- NO

Was the patient intubated in hospital?

- YES
- NO

### Exclusion criteria

Was the patient intubated ONLY for receiving general anesthesia?

(e.g. general anesthesia for scheduled major surgery)

- YES
- NO

Was intubation performed for cardiac arrest?

- YES
- NO

If all the criteria were met, is the patient finally enrolled in the study?

- YES
- NO

If NO, reasons for not enrolment:

- Local investigator not present during the event
- Treating physician's decision
- Lack of any form of required informed consent
- Other, specify \_\_\_\_\_

# 1. ENROLLMENT

Patient's ID number: \_\_\_\_\_  
Date of hospital admission: \_\_\_\_\_(DD)/\_\_\_\_\_(MM)/\_\_\_\_\_(YY)  
Date of intubation: \_\_\_\_\_(DD)/\_\_\_\_\_(MM)/\_\_\_\_\_(YY)  
Time of intubation: (HH:MM) \_\_\_\_\_: \_\_\_\_\_ am  pm   
Informed consent required? YES  NO  (Choose no if waived by local EC)  
If required, was consent obtained? YES  NO   
If yes, date of informed consent: \_\_\_\_\_ / \_\_\_\_\_ / \_\_\_\_\_

# 2. DEMOGRAPHIC AND CLINICAL CHARACTERISTICS

Sex: M  F  Birth year: \_\_\_\_\_ Age: \_\_\_\_\_  
Height: \_\_\_\_\_ inch  cm  Weight: \_\_\_\_\_ lbs  Kg   
Comorbidities (check all that apply):  
 Asthma  
 COPD  
 Diabetes Mellitus  
 Solid neoplasm  
 Metastatic  Non-metastatic  Unknown  
 Hematologic malignancy  
 Heart failure (NYHA III-IV)  
 Ischemic heart disease  
 Arterial hypertension  
 Renal failure  
 Chronic liver failure  
 Neuromuscular disease  
 OSAS (with use of nocturnal CPAP ; without use of nocturnal CPAP   
 Interstitial lung disease  
 Respiratory infection < 30 days ago  
 Other, please specify \_\_\_\_\_  
 None



### 3. INTUBATION SETTING

Place of intubation

- Intensive Care Unit (ICU)
- Emergency Department (ED)
- Ward areas
- Other, specify \_\_\_\_\_

Did you transfer the patient from another place to perform intubation?

YES  NO

For intubation performed in the ICU:

Admission source:

- Emergency Department (ED)
- Medical ward
- Surgical Ward
- Operating room/recovery room
- Other ICU from the same hospital
- Other hospital
- Other, please specify: \_\_\_\_\_

For intubation performed in the ED:

Admission source:

- Emergency Medical Service/Helicopter Emergency Medical Service
- Home (with private vehicle transport)
- Long-term care facility
- Other hospital
- Other, please specify: \_\_\_\_\_

For intubation performed in a ward:

Please specify if  medical ward  surgical ward

Admission source:

- Emergency Department
- Other ward
- Operating room
- ICU
- Other, please specify \_\_\_\_\_

Has the patient been previously intubated during THIS hospital admission?

- YES
- NO

MAIN Reason for new intubation (check the main reason):

- Respiratory failure
- Airway obstruction
- Cardiovascular instability
- Neurological impairment

Other, specify \_\_\_\_\_

In case of reintubation:

Specify the date of extubation: \_\_\_\_/\_\_\_\_/\_\_\_\_

Extubation performed in operating room?  YES  NO

MAIN reason for reintubation (check the main reason):

Respiratory failure

Airway obstruction

Cardiovascular instability

Self – extubation

Neurological impairment

Inadequate reversal of neuromuscular block

Other, specify \_\_\_\_\_

Degree of emergency of endotracheal intubation (ETI)

Intubation required without any delay

Intubation required in < 1 hour

Intubation required in  $\geq$  1 hour

Anticipated ("anatomical") difficult airway management?

YES

NO

Evaluation not performed

Predictors of difficult airway management

Mallampati score III-IV

Reduced mouth opening (< 3 cm)

Short neck

Neck stiffness

Facial trauma

Need of cervical spine immobilization

High-risk of full stomach

Prognathism (abnormal anterior position of the mandible)

Retrognathia (abnormal posterior position of the mandible)

Large tongue

Beard

Obesity

Other, specify \_\_\_\_\_

## 4. PATIENT'S PARAMETERS BEFORE INTUBATION

Systolic blood pressure (last available before preoxygenation start):

\_\_\_\_\_ mmHg

Diastolic blood pressure (last available before preoxygenation start):

\_\_\_\_\_ mmHg

Heart rate (last available before preoxygenation start): \_\_\_\_\_ /min

Respiratory rate (last available before preoxygenation start): \_\_\_\_\_ /min

SpO<sub>2</sub> % (last available before preoxygenation start): \_\_\_\_\_ %

Body temperature available (last available before preoxygenation start)  YES  NO

Body temperature: \_\_\_\_\_  °C  °F

Need of vasopressor/inotrope support? (before preoxygenation start)

YES  NO

Specify all inotropes/vasopressors that apply:

Norepinephrine; rate of infusion: \_\_\_\_\_ mcg/Kg/min

Epinephrine; rate of infusion: \_\_\_\_\_ mcg/Kg/min

Dopamine; rate of infusion: \_\_\_\_\_ mcg/Kg/min

Dobutamine; rate of infusion: \_\_\_\_\_ mcg/Kg/min

Other; please specify: \_\_\_\_\_ rate of infusion: \_\_\_\_\_  
mcg/Kg/min

Fluid load administered in the last 30 minutes before intubation?

YES  NO

Specify total volume \_\_\_\_\_ ml

Arterial blood gas analysis available? (last available before preoxygenation start)?

YES  NO

Specify FiO<sub>2</sub> % \_\_\_\_\_ %

PaO<sub>2</sub> \_\_\_\_\_  mmHg  kPa

PaCO<sub>2</sub> \_\_\_\_\_  mmHg  kPa

PH \_\_\_\_\_

HCO<sub>3</sub><sup>-</sup> (mEq/L - mmol/L) \_\_\_\_\_

Base excess (BE) \_\_\_\_\_

Lactate (mmol/L) \_\_\_\_\_

Ongoing respiratory support (e.g. O<sub>2</sub>, CPAP, NIV BEFORE start of preoxygenation)?

YES  NO

Type of respiratory support

Standard oxygen

High flow nasal cannula (HFNC)

Continuous positive airway pressure (CPAP)

Noninvasive positive pressure ventilation (NPPV)

Is the patient receiving oxygen before intubation?

YES  NO

If yes, please specify the oxygen flow: \_\_\_\_\_ L/min

And the delivery system:

Nasal cannula

High-flow nasal cannula (Specify total flow \_\_\_\_\_ L/min; Specify FiO<sub>2</sub>: \_\_\_\_\_ %)

Facemask

with O<sub>2</sub> reservoir  without O<sub>2</sub> reservoir

Venturi system (Specify O<sub>2</sub> flow \_\_\_\_\_ L/min; Specify FiO<sub>2</sub>: \_\_\_\_\_ %)

Other, please specify \_\_\_\_\_

Is the patient receiving CPAP?

YES  NO

If yes, specify the CPAP level: \_\_\_\_\_ cmH<sub>2</sub>O

Specify the FiO<sub>2</sub>: \_\_\_\_\_ %

Specify the interface:

Helmet

Oronasal

Full face

Nasal

Other, please specify \_\_\_\_\_

Is the patient receiving NPPV?

YES  NO

If YES, please specify the pressure support administered: PS \_\_\_\_\_ cmH<sub>2</sub>O

Specify the PEEP level: \_\_\_\_\_ cmH<sub>2</sub>O

Specify the FiO<sub>2</sub>: \_\_\_\_\_ %

Specify the interface:

Helmet

Oronasal

Full face

Nasal

Other, please specify \_\_\_\_\_

Glasgow Coma Scale

Eye opening response: \_\_\_\_\_ (1-4)

Best verbal response: \_\_\_\_\_ (1-5)

Best motor response: \_\_\_\_\_ (1-6)

Laboratory data (last available before preoxygenation start)

White blood cell available?

YES  NO

If YES, specify \_\_\_\_\_ ( $\times 10^3/\mu\text{l}$ )

Platelet count available?

YES  NO

If YES, specify \_\_\_\_\_ ( $\times 10^3/\mu\text{l}$ )

Bilirubin level available?

YES  NO

If YES, specify \_\_\_\_\_  $\mu\text{mol/L}$    $\text{mg/dL}$

Creatinine level available?

YES  NO

If YES, specify \_\_\_\_\_  $\mu\text{mol/L}$    $\text{mg/dL}$

BUN level available?

YES  NO

If YES, specify \_\_\_\_\_  $\mu\text{mol/L}$    $\text{mg/dL}$

Sodium level available?

YES  NO

If YES, specify \_\_\_\_\_  $\text{mEq/L}$  -  $\text{mmol/L}$

Potassium level available?

YES  NO

If YES, specify \_\_\_\_\_  $\text{mEq/L}$  -  $\text{mmol/L}$

Chest X-ray or CT scan available?

YES  NO

If YES, Chest X-ray or CT scan findings (check all that apply):

- Normal lung fields
- Pleural effusion
- Monolateral lung opacity
- Bilateral lung opacities
- Pulmonary contusion
- Rib fracture(s)
- Pneumothorax
- Hemothorax

Other, please specify: \_\_\_\_\_

## 5. INTUBATION PROCEDURE

### *Preparation*

Did you apply the protocol for airway management of critically ill patients of your hospital?

- YES
- NO
- Not available

Did you perform the emergency airway checklist of your institution?

- YES
- NO
- Not available

Was a difficult airway trolley present in your institution (at the intubation site)?

- YES
- NO
- Not available

Monitoring selected during the intubation procedure (check all that apply):

- ECG (3 or 5 leads)
- SpO<sub>2</sub>
- Noninvasive blood pressure
- Invasive blood pressure
- Waveform capnography
- Capnometry
- Other \_\_\_\_\_

### *Preoxygenation*

Preoxygenation START time

(specify the precise time in terms of hours and minute, i.e. 10:32)

\_\_\_\_\_ : \_\_\_\_\_ (HH:MM)

Patient position during preoxygenation

- Supine position
- Beach chair position
- 20° head-up position
- 30 – 45° head-up position
- Ramp position
- Trendelenburg position
- Reverse Trendelenburg position
- Other, please specify: \_\_\_\_\_

Elective method of preoxygenation

Device used for preoxygenation:

- Bag valve mask.

O<sub>2</sub> flow \_\_\_\_\_ L/min. O<sub>2</sub> reservoir available YES  NO

- Standard facemask  
O<sub>2</sub> flow \_\_\_\_\_ L/min. O<sub>2</sub> reservoir available YES  NO
- Venturi mask  
O<sub>2</sub> flow \_\_\_\_\_ L/min. FiO<sub>2</sub> \_\_\_\_\_ %
- Nasal cannula (standard)  
O<sub>2</sub> flow \_\_\_\_\_ L/min
- High-flow oxygen nasal cannula  
Total flow \_\_\_\_\_ L/min. FiO<sub>2</sub> \_\_\_\_\_ %
- CPAP  
CPAP level \_\_\_\_\_ cmH<sub>2</sub>O. FiO<sub>2</sub> \_\_\_\_\_ %  
Specify the interface:  
 Helmet  
 Oronasal  
 Full face  
 Nasal  
 Other, please specify \_\_\_\_\_
- NPPV  
PS \_\_\_\_\_ cmH<sub>2</sub>O. PEEP \_\_\_\_\_ cmH<sub>2</sub>O. FiO<sub>2</sub> \_\_\_\_\_ %  
Specify the interface:  
 Helmet  
 Oronasal  
 Full face  
 Nasal  
 Other, please specify \_\_\_\_\_
- Other, please specify \_\_\_\_\_  
O<sub>2</sub> \_\_\_\_\_ L/min

Specify SpO<sub>2</sub> at the end of preoxygenation for the first attempt: \_\_\_\_\_ %

Oxygen administration during laryngoscopy/fiberoscopy (apneic oxygenation)?

YES  NO

If YES, please specify the method:

- Standard nasal cannula  
 High flow nasal cannula (HFNC)  
 Facemask (with fiberoptic port)  
 Helmet (with fiberoptic port)  
 Other \_\_\_\_\_

Drugs

Rapid sequence induction applied? (avoidance of positive pressure ventilation between induction and laryngoscopy, rapid onset muscle relaxant use)

YES  NO

Drugs used (check all that apply):

- Awake intubation  
 Lidocaine spray  
 Propofol \_\_\_\_\_ mg  
 Thiopental \_\_\_\_\_ mg

- Midazolam \_\_\_\_\_ mg
- Ketamine \_\_\_\_\_ mg
- Etomidate \_\_\_\_\_ mg
- Succinylcholine \_\_\_\_\_ mg
- Rocuronium \_\_\_\_\_ mg
- Vecuronium \_\_\_\_\_ mg
- Cisatracurium \_\_\_\_\_ mg
- Fentanyl \_\_\_\_\_  mg  µg
- Remifentanyl \_\_\_\_\_  mg  µg
- Sufentanyl \_\_\_\_\_  mg  µg
- Alfentanyl \_\_\_\_\_  mg  µg
- Morphine \_\_\_\_\_ mg
- Others, please specify: \_\_\_\_\_

Laryngoscopy and endotracheal intubation

1st laryngoscopy START time

(specify the precise time in terms of hours and minute, i.e. 10:32)

\_\_\_\_\_ : \_\_\_\_\_ (HH:MM)

Cricoid pressure applied?

- YES  NO

Elective method/device for laryngoscopy

- Direct laryngoscopy with Macintosh blade
- Direct laryngoscopy with Miller blade
- Videolaryngoscopy
  - Macintosh – type blade  Hyperangulated blade
- Fiberoptic
  - standard  through the CPAP/NIV interface  through a supraglottic airway
  - Other, specify \_\_\_\_\_

Use of any intubation adjunct (e.g. bougie, stylet) for the first attempt

- YES  NO

If yes:

- Bougie
- Stylet
- Other, specify \_\_\_\_\_

Total number of laryngoscopy attempts \_\_\_\_\_

(laryngoscope in - laryngoscope out from patient's mouth)

Endotracheal intubation finally obtained?  YES  NO

Type of intubation  Orotracheal  Nasotracheal

Esophageal intubation during at least 1 attempt?  YES  NO

Preoxygenation performed between multiple laryngoscopic attempts?  YES  NO



Successful method/device for laryngoscopy

- Direct laryngoscopy with Macintosh blade
- Direct laryngoscopy with Miller blade
- Videolaryngoscopy
  - Macintosh – type blade
  - Hyperangulated blade
- Fiberoptic
  - standard
  - through the CPAP/NIV interface
  - through a supraglottic airway
- Other, specify \_\_\_\_\_

Use of any intubation adjunct (e.g. bougie, stylet) for the successful attempt

- YES  NO
- If yes:
  - Bougie
  - Stylet
  - Other, specify \_\_\_\_\_

END of last laryngoscopy time (i.e confirmed endotracheal intubation)  
(specify the precise time in terms of hours and minute, i.e. 10:32)  
\_\_\_\_\_ : \_\_\_\_\_ (HH:MM)

Laryngoscopic view (Cormack - Lehane)

- I
- II
- III
- IV

Lowest SpO<sub>2</sub> % value registered during the whole procedure (1st or following attempts)  
\_\_\_\_\_ %

First method used to confirm endotracheal intubation:

- Waveform capnography
- Capnometry
- Colorimetric CO<sub>2</sub> detection
- Auscultation
- Chest X-ray
- Fiberoscopy
- None
- Other, please specify \_\_\_\_\_

What did happen after the failed intubation? (Specify the last event/intervention)

- Supraglottic airway insertion
- Cricothyroidotomy
- Percutaneous tracheostomy
- Surgical tracheostomy
- Cannot intubate cannot oxygenate scenario
- Other \_\_\_\_\_

*Operator's training*

Specify total number of operators involved in the procedure and qualified to perform of intubation

---

Operator performing the 1st attempt

- Medical student
- Resident
- Fellow
- Staff physician/consultant
- Other \_\_\_\_\_

Specify the field of training of the operator performing the 1st attempt:

- Anesthesia and Intensive Care
- Critical Care/Intensive Care
- Emergency Medicine
- Internal Medicine
- Pulmonary Medicine
- Pulmonary and Critical Care Medicine
- Surgery
- Other \_\_\_\_\_

N° intubation(s)/week of the operator performing the 1st attempt:

- ≤ 1 intubation/week
- 2 -5 intubations/week
- 6 – 10 intubations/week
- 11 – 20 intubations/week
- > 20 intubations/week

Is the operator performing the successful attempt the same as the operator performing the 1st attempt?

- YES  NO

Operator performing the successful attempt:

- Medical student
- Resident
- Fellow
- Staff physician/consultant
- Other \_\_\_\_\_

Specify the field of training of the operator performing the successful attempt:

- Anesthesia and Intensive Care
- Critical Care/Intensive Care
- Emergency Medicine
- Internal Medicine
- Pulmonary Medicine
- Pulmonary and Critical Care Medicine
- Surgery
- Other \_\_\_\_\_

N° intubation(s)/week of the operator performing the successful attempt:

- ≤ 1 intubation/week
- 2 -5 intubations/week
- 6 – 10 intubations/week
- 11 – 20 intubations/week
- > 20 intubations/week

## 6. OUTCOME OF INTUBATION

Lowest systolic blood pressure after intubation (within 30 minutes from the procedure) available?

YES  NO

If Yes \_\_\_\_\_ mmHg

Systolic blood pressure < 90 mmHg was present for more than 30 minutes?

YES  NO

Lowest diastolic blood pressure after intubation (within 30 minutes from the procedure) available?

YES  NO

If Yes \_\_\_\_\_ mmHg

Heart rate after intubation (within 30 minutes from the procedure) available?

YES  NO

If Yes \_\_\_\_\_ /min

Need of new/increase of vasopressors/inotropes after intubation?

YES  NO

Specify all inotropes/vasopressors that apply:

Norepinephrine; rate of infusion: \_\_\_\_\_ mcg/Kg/min

Epinephrine; rate of infusion: \_\_\_\_\_ mcg/Kg/min

Dopamine; rate of infusion: \_\_\_\_\_ mcg/Kg/min

Dobutamine; rate of infusion: \_\_\_\_\_ mcg/Kg/min

Other; please specify: \_\_\_\_\_ rate of infusion: \_\_\_\_\_ mcg/Kg/min

Fluid bolus administered after intubation (within 30 minutes from the procedure)?

YES  NO

Total volume of administered fluid after intubation (within 30 minutes from the procedure)

\_\_\_\_\_ ml

Arterial blood gas analysis available after the procedure? (within 1 hour)

YES  NO

Specify FiO<sub>2</sub> % \_\_\_\_\_ %

PEEP (cmH<sub>2</sub>O) \_\_\_\_\_

PaO<sub>2</sub> \_\_\_\_\_  mmHg  kPa

PaCO<sub>2</sub> \_\_\_\_\_  mmHg  kPa

PH \_\_\_\_\_

HCO<sub>3</sub><sup>-</sup> (mEq/L - mmol/L) \_\_\_\_\_

Base excess (BE) \_\_\_\_\_

Lactate (mmol/L) \_\_\_\_\_

Adverse events

New onset cardiac arrhythmia (within 30 minutes from intubation)?

YES  NO

If yes:

- Atrial fibrillation
- Ventricular tachycardia
- Other \_\_\_\_\_

Cardiac arrest (within 30 minutes from intubation)

YES  NO

If YES,  with return of spontaneous circulation (ROSC)  with death

Specify the supposed main reason for cardiac arrest development:

- Hypoxia
- Hypovolemia/Hemodynamic collapse
- Hypo/-hyperkalemia
- Tension pneumothorax
- Cardiac tamponade
- Thrombosis (coronary or pulmonary)
- Toxins
- Other \_\_\_\_\_

Aspiration of gastric contents (detected within 24 hrs from intubation)?

(Inhalation of gastric contents into the larynx and the respiratory tract)

YES  NO

Dental injury due to airway management?

(Any notable change to the patient's dentition attributable to the procedure of endotracheal intubation)

YES  NO

Airways injury due to airway management (detected within 24 hrs from intubation)?

(Any detectable/clinically relevant airways injury attributable to the endotracheal intubation procedure, e.g. bleeding, tracheal tear/laceration)

YES  NO

Specify the type of airways injury:

- Tracheal laceration
- Bronchial laceration
- Laryngeal laceration
- Other \_\_\_\_\_

Detection of pneumothorax within 24 hrs from intubation?

YES  NO

Detection of pneumo-mediastinum within 24 hrs from intubation?

YES  NO

## 7. STATUS AT ICU DISCHARGE

Date of ICU discharge \_\_\_\_\_:\_\_\_\_\_ (HH:MM)

Status at ICU discharge

Dead

Alive

Other \_\_\_\_\_
